# 1 Links between gut microbiome composition and fatty liver disease in 2 a large population sample

3  
4 Matti O. Ruuskanen<sup>1,2\*</sup>, Fredrik Åberg<sup>3,4</sup>, Ville Männistö<sup>5,6</sup>, Aki S. Havulinna<sup>2,7</sup>, Guillaume  
5 Méric<sup>8,9</sup>, Yang Liu<sup>8,10</sup>, Rohit Loomba<sup>11,12</sup>, Yoshiki Vázquez-Baeza<sup>13,14</sup>, Anupriya Tripathi<sup>15,16,17</sup>,  
6 Liisa M. Valsta<sup>2</sup>, Michael Inouye<sup>8,18</sup>, Pekka Jousilahti<sup>2</sup>, Veikko Salomaa<sup>2</sup>, Mohit Jain<sup>12,19</sup>, Rob  
7 Knight<sup>13,14,20,21</sup>, Leo Lahti<sup>22</sup>, Teemu J. Niiranen<sup>1,2,23</sup>

8  
9 <sup>1</sup>Department of Internal Medicine, University of Turku, Turku, Finland

10 <sup>2</sup>Department of Public Health Solutions, Finnish Institute for Health and Welfare, Helsinki, Finland

11 <sup>3</sup>Transplantation and Liver Surgery Clinic, Helsinki University Hospital, University of Helsinki, Helsinki, Finland

12 <sup>4</sup>The Transplant Institute, Sahlgrenska University Hospital, Gothenburg, Sweden

13 <sup>5</sup>Department of Medicine, Kuopio University Hospital, University of Eastern Finland, Kuopio, Finland

14 <sup>6</sup>Department of Experimental Vascular Medicine, Amsterdam UMC, University of Amsterdam, Amsterdam, The  
15 Netherlands

16 <sup>7</sup>Institute for Molecular Medicine Finland, FIMM - HiLIFE, Helsinki, Finland

17 <sup>8</sup>Cambridge Baker Systems Genomics Initiative, Baker Heart and Diabetes Institute, Melbourne, Victoria, Australia

18 <sup>9</sup>Department of Infectious Diseases, Central Clinical School, Monash University, Melbourne, Victoria, Australia

19 <sup>10</sup>Department of Clinical Pathology, The University of Melbourne, Melbourne, Victoria, Australia

20 <sup>11</sup>Department of Medicine, NAFLD Research Center, La Jolla, CA, USA

21 <sup>12</sup>Department of Medicine, University of California, San Diego, La Jolla, CA, USA

22 <sup>13</sup>Jacobs School of Engineering, University of California, San Diego, La Jolla, CA, USA

23 <sup>14</sup>Center for Microbiome Innovation, University of California San Diego, La Jolla, California, USA

24 <sup>15</sup>Collaborative Mass Spectrometry Innovation Center, Skaggs School of Pharmacy and Pharmaceutical Sciences,  
25 University of California, San Diego, La Jolla, California, USA

26 <sup>16</sup>Skaggs School of Pharmacy and Pharmaceutical Sciences, University of California, San Diego, La Jolla,  
27 California, USA

28 <sup>17</sup>Division of Biological Sciences, University of California, San Diego, La Jolla, California, USA

29 <sup>18</sup>Department of Public Health and Primary Care, Cambridge University, Cambridge, United Kingdom

30 <sup>19</sup>Department of Pharmacology, University of California San Diego, La Jolla, California, USA

31 <sup>20</sup>Department of Pediatrics, School of Medicine, University of California San Diego, La Jolla, California, USA

32 <sup>21</sup>Department of Computer Science & Engineering, University of California San Diego, La Jolla, California, USA

33 <sup>22</sup>Department of Future Technologies, University of Turku, Turku, Finland

34 <sup>23</sup>Division of Medicine, Turku University Hospital, Turku, Finland

35  
36 \*Correspondence: Matti Ruuskanen, [matti.ruuskanen@utu.fi](mailto:matti.ruuskanen@utu.fi)

37  
38 Running head: Gut microbiome composition and fatty liver

39

## 40 **Abstract**

41 Fatty liver disease is the most common liver disease in the world. It is characterized by a build-  
42 up of excess fat in the liver that can lead to cirrhosis and liver failure. The link between fatty  
43 liver disease and gut microbiome has been known for at least 80 years. However, this association  
44 remains mostly unstudied in the general population because of underdiagnosis and small sample  
45 sizes. To address this knowledge gap, we studied the link between the Fatty Liver Index (FLI), a  
46 well-established proxy for fatty liver disease, and gut microbiome composition in a  
47 representative, ethnically homogeneous population sample in Finland. We based our models on  
48 biometric covariates and gut microbiome compositions from shallow metagenome sequencing.  
49 Our classification models could discriminate between individuals with a high FLI ( $\geq 60$ ,  
50 indicates likely liver steatosis) and low FLI ( $< 60$ ) in our validation set, consisting of 30% of the  
51 data not used in model training, with an average AUC of 0.75. In addition to age and sex, our  
52 models included differences in 11 microbial groups from class *Clostridia*, mostly belonging to  
53 orders *Lachnospirales* and *Oscillospirales*. Pathway analysis of representative genomes of the  
54 FLI-associated taxa in (NCBI) *Clostridium* subclusters IV and XIVa indicated the presence of  
55 *e.g.*, ethanol fermentation pathways. Through modeling the fatty liver index, our results provide  
56 with high resolution associations between gut microbiota composition and fatty liver in a large  
57 representative population cohort and support the role of endogenous ethanol producers in the  
58 development of fatty liver.

59

60 **Keywords: Metagenomics, human gut, fatty liver, fatty liver index, population sample**

## 61 **Introduction**

62 Fatty liver disease affects roughly a quarter of the world's population.<sup>1</sup> It is characterized by  
63 accumulation of fat in the liver cells and is intimately linked with pathophysiology of metabolic  
64 syndrome.<sup>2-4</sup> Fatty liver disease can be broadly divided into two variants: non-alcoholic fatty  
65 liver disease (NAFLD), attributed to high caloric intake, and alcohol associated fatty liver  
66 disease, attributed to high alcohol consumption. Even though the rate of progressions and  
67 underlying causes of both diseases might be different, they can be broadly sub-divided into those  
68 who have fat accumulation in the liver with no or minimal inflammation or those who have  
69 additional features of cellular injury and active inflammation with or without fibrosis typically  
70 seen in peri-sinusoidal area.<sup>5</sup> Patients with steatohepatitis may progress to cirrhosis and  
71 hepatocellular carcinoma and have increased risk of liver-related morbidity and mortality,  
72 globally amounting to hundreds of thousands of deaths.<sup>6</sup>

73

74 The human gut harbors up to  $10^{12}$  microbes per gram of content,<sup>7</sup> and is intimately connected  
75 with the liver. Thus, it is no surprise that gut microbiome composition appears to have a strong  
76 connection with liver disease.<sup>8</sup> Numerous studies over the past 80 years have reported  
77 associations between gut microbial composition and liver disease.<sup>9</sup> For example, gut  
78 permeability and overgrowth of bacteria in the small intestine,<sup>10</sup> changes in  
79 *Gammaproteobacteria* and *Erysipelotrichi* abundance during choline deficiency,<sup>11</sup> elevated  
80 abundance of ethanol-producing bacteria,<sup>12,13</sup> metagenomic signatures of specific bacterial  
81 species,<sup>14,15</sup> have all been linked to NAFLD in small case-control patient samples. However, the  
82 microbial signatures often overlap between NAFLD and metabolic diseases, while those of more  
83 serious liver disease such as steatohepatitis and cirrhosis are more clear.<sup>16</sup> For example, oral taxa

84 appear to invade the gut in liver cirrhosis,<sup>17</sup> and this phenotype can accurately be detected by  
85 analyzing the fecal microbiome composition (AUC = 0.87 in a validation cohort).<sup>8</sup> Furthermore,  
86 we recently demonstrated good prediction accuracy for incident liver disease diagnoses (AUC =  
87 0.83 for non-alcoholic liver disease, AUC = 0.96 for alcoholic liver disease, during ~15 years),<sup>18</sup>  
88 showing that the signatures of serious future liver disease are easy to detect.

89  
90 The mechanisms underlying the contribution of gut microbiome content with fatty liver disease  
91 are thought to be primarily linked to gut bacterial metabolism. Bacterial metabolites can indeed  
92 be translocated from the gut through the intestinal barrier into the portal vein and transported to  
93 the liver, where they interact with liver cells, and can lead to inflammation and steatosis.<sup>19</sup> Short-  
94 chain fatty acid production, conversion of choline into methylamines, modification of bile acids  
95 (BA) into secondary BA, and ethanol production, all of which are mediated by gut bacteria, are  
96 also known to be aggravating factors for NAFLD.<sup>19</sup> Recent studies have also suggested that  
97 endogenous ethanol production by gut bacteria could lead to an increase in gut membrane  
98 permeability.<sup>13</sup> This can facilitate the translocation of bacterial metabolites and cell components  
99 such as lipopolysaccharides from the gut to the liver, leading to further inflammation and  
100 possible development of NAFLD.<sup>20</sup>

101  
102 Liver biopsy assessment is the current gold standard for diagnosis of fatty liver disease and its  
103 severity,<sup>21</sup> but it is also impractical and unethical in a population-based setting. Ultrasound and  
104 MRI based assessment can help detect presence of fatty liver, however, this data is not available  
105 in our cohort. Regardless, recent studies have shown that indices based on anthropometric

106 measurements and standard blood tests can be a reliable tool for non-invasive diagnosis of fatty  
107 liver particularly in population-based epidemiologic studies.<sup>22,23</sup>  
108  
109 Here, we designed and conducted computational analyses to examine the links between fatty  
110 liver and gut microbiome composition in a representative population sample of 7211 extensively  
111 phenotyped Finnish individuals.<sup>24</sup> Because fatty liver disease is generally underdiagnosed in the  
112 general population,<sup>25</sup> we used population-wide measurements of BMI, waist circumference,  
113 blood triglycerides and gamma-glutamyl-transferase (GGT) to calculate a previously validated  
114 Fatty Liver Index (FLI) for each participant as a proxy for fatty liver.<sup>26</sup> In parallel, we used  
115 shallow shotgun sequencing to analyze gut microbiome composition,<sup>27</sup> which also enabled the  
116 use of phylogenetic and pathway prediction methods. In this work, we describe high-resolution  
117 associations between fatty liver and individual gut microbial taxa and clades, which are  
118 generalizable at the population level.

119

## 120 **Results**

### 121 *Bacterial community structure is correlated with Fatty Liver Index in a population* 122 *sample*

123 To investigate the link between fatty liver disease (using FLI as a proxy; **Figures 1A, 1B**) and  
124 gut microbial composition, we used linear regression (adjusted  $R^2 = 0.29$ ) on the three first  
125 principal component (PC) axes of the fecal bacterial beta-diversity (between individuals), sex,  
126 age, and alcohol to model FLI.  $\log_{10}(\text{FLI})$  significantly correlated with all three bacterial PC  
127 axes, sex, age, and alcohol use (all  $P < 1 \times 10^{-6}$ ). Correlations between FLI and archaeal PC axes  
128 were not significant ( $P > 0.05$ ). The effect size estimate on  $\log_{10}(\text{FLI})$  was a magnitude larger for

129 PC1 ( $0.11 \pm 0.008$ ) than for PC2 ( $0.04 \pm 0.008$ ) and PC3 ( $-0.06 \pm 0.008$ ). The relationships  
130 between FLI and the bacterial PC components representing their beta-diversity are visualized for  
131 each of the three components in **Figure 1C**. In our analyses, we classified our reads against the  
132 Genome Taxonomy Database (GTDB),<sup>28</sup> and thus the taxonomy discussed in this study follows  
133 the standardized GTDB taxonomy, unless otherwise noted.

134

135 Bacterial clades with the highest positive loadings on PC1 (and therefore associated with higher  
136 FLI values) included members of the *Lachnospirales* and *Oscillospirales* taxonomic orders, of  
137 the *Bacilli* class, and of the *Ruminococcaceae*, *Bacteroidaceae* and *Lachnospiraceae* families  
138 (**Figure S2**). These observations led us to further analyses within a machine learning framework  
139 to estimate the relative contributions of individual bacterial taxa to the differences in FLI  
140 between study participants.

141

### 142 ***Bacterial lineages within the NCBI Clostridium subclusters IV and XIVa associate*** 143 ***with FLI***

144 In our machine learning framework, we used the known covariates in addition to individual  
145 archaeal and bacterial “balances” as the predicting features. Briefly, each balance represents a  
146 single internal node in a phylogenetic tree, and its value is a log-ratio of the abundances of the  
147 two clades descending this node (for details, see methods and ref. 29). Continuous FLI and  
148 differences between FLI groups (FLI < 60,  $N = 4359$  and FLI  $\geq 60$ ,  $N = 1910$ ; see **Figures 1A,**  
149 **1B**) were modeled with gradient boosting regression or classification using Leave-One-Group-  
150 Out Cross-Validation (LOGOCV) between participants from different regions.

151

152 After feature selection and Bayesian hyperparameter optimization, the correlation between the  
153 predictions of the final regression models (age, sex, self-reported alcohol use, and 18 bacterial  
154 balances as features; each trained on the data from 5/6 regions) and true values in unseen data  
155 from the omitted region averaged  $R^2 = 0.30$  (0.26 – 0.33). After feature selection and  
156 optimization, the main classification models (age, sex, and 11 bacterial balances as features; each  
157 trained on the data from 5/6 regions) averaged AUC = 0.75 (**Table S1**) and AUPRC = 0.56  
158 (baseline at 0.30; **Table S2**) on (unseen) test data from the omitted region. Models trained using  
159 only the covariates averaged AUC = 0.71 (AUPRC = 0.47) and using only the 11 bacterial  
160 balances they averaged AUC = 0.66 (AUPRC = 0.47) on test data. Alternative models were  
161 constructed by excluding participants with FLI between 30 and 60 (N = 1583) and discerning  
162 between groups of  $FLI < 30$  (N = 2776) and  $FLI \geq 60$  (N = 1910). These models averaged AUC  
163 = 0.80 (AUPRC = 0.75, baseline at 0.41) on their respective test data. They averaged AUC =  
164 0.76 (AUPRC = 0.68) when using only the covariates, and AUC = 0.70 (AUPRC = 0.63) when  
165 using only the 20 bacterial balances.

166

167 Because training data from all 6 regions was used to prevent overfitting in the selection of core  
168 features for all of the models, and similarly in searching for common hyperparameters,  
169 participants from the validation region of each model (in the training partition) partly influenced  
170 these parameters. Thus, we also constructed classification models discerning between the  $FLI <$   
171  $60$  and  $FLI \geq 60$  groups, where data of the validation region was completely excluded in the  
172 feature selection and hyperparameter optimization of each LOGOCV model. These models,  
173 using their individual feature sets and hyperparameters, averaged AUC = 0.75 and AUPRC =  
174 0.57 (baseline at 0.30) on test data from their respective validation regions (**Table S3**). Using

175 only covariates, they averaged AUC = 0.71 (AUPRC = 0.47), and AUC = 0.67 (AUPRC = 0.48)  
176 with only the bacterial balances.

177

178 To facilitate interpretability of the results, we primarily continued examining the main  
179 classification models using a common set of core features. In these models, the median effect  
180 sizes of the features on the model predictions at their minimum and maximum values were  
181 highest for age, followed by sex, and the 11 balances in the phylogenetic tree (**Figures S2, S3**).

182 All 11 associated balances were in phylum *Firmicutes*, class *Clostridia*, and largely in the NCBI  
183 *Clostridium* subclusters IV and XIVa (**Figure 2**). The specific taxa represented standardized  
184 GTDB genera (NCBI in brackets) *Negativibacillus* (*Clostridium*), *Clostridium M*

185 (*Lachnoclostridium* / *Clostridium*), *CAG-81* (*Clostridium*), *Dorea* (*Merdimonas* / *Mordavella* /

186 *Dorea* / *Clostridium* / *Eubacterium*), *Faecalicatena* (*Blautia* / *Ruminococcus* / *Clostridium*),

187 *Blautia* (*Blautia*), *Sellimonas* (*Sellimonas* / *Drancourtella*), *Clostridium Q* (*Lachnoclostridium*

188 [*Clostridium*]) and *Tyzzarella* (*Tyzzarella* / *Coprococcus*). Notably, all but one of the features in

189 the main classification models (n226) were identified in the feature selection for the alternative

190 models (constructed otherwise identically, but  $FLI < 30$  was compared against  $FLI \geq 60$  in

191 different data partitions), together with 10 additional balances (**Figure S4**). Only one of the

192 balances in the alternative models was outside phylum *Firmicutes* (n1712 in *Bacteroidota*), and

193 in addition, 4 balances were outside class *Clostridia* (n481 in *Negativicutes*; n826, n1009 and

194 n918 in *Bacilli*).

195

196 In addition to blood test results, FLI is based on anthropometric markers linked to metabolic

197 syndrome, waist circumference and BMI. This prompted us to attempt to dissect the index and



198 identify which of the covariates and associated microbial balances from the phylogenetic tree can  
199 be linked to blood GGT and triglycerides measurements (see **Figure 1B**), and therefore would be  
200 more specific to hepatic steatosis and liver damage. To do so, we performed feature selection  
201 (similarly to continuous FLI) for GGT and triglycerides measurements in subsets of participants  
202 grouped by age, sex, and BMI. The feature selection identified two balances within the NCBI  
203 *Clostridia* XIVa subcluster (identified as n336 and n330) which were important for both GGT  
204 and triglyceride level prediction, and thus likely specific to liver function (**Figure 2**). Bacterial  
205 taxa were positively linked to liver function in these balances, and included (NCBI species)  
206 *Clostridium clostridioforme*, *C. bolteae*, *C. citroniae*, *C. saccharolyticum* and *C. symbiosum*.  
207

208 ***Ethanol and acetate production pathways are identified in representative bacterial***  
209 ***genomes from taxa linked to liver function***

210 The values of predictive balances in the phylogenetic tree cannot be summarized for individual  
211 taxa, which means that only a qualitative investigation of the associations between their  
212 metabolism and fatty liver was possible in this study. We identified genetic pathways predicted  
213 to encode for SCFA (acetate, propanoate, butanoate) and ethanol production, BA metabolism,  
214 and choline degradation to trimethylamine in representative genomes from the taxa we identified  
215 to be linked to liver function (**Figure S3**). These specific processes were chosen because they  
216 have been previously identified to have a mechanistic link to NAFLD (see *e.g.*, ref. 19).

217  
218 Acetate and ethanol production pathways appeared to be more abundant in the representative  
219 genomes of the taxa which had a positive association with FLI. In the liver function specific  
220 clades, n336 and n330, MetaCyc pathways for pyruvate fermentation to ethanol III (PWY-6587)

221 and L-glutamate degradation V (via hydroxyglutarate; P162-PWY; produces acetate and  
222 butanoate) were present only in genomes positively associated with FLI. In balance n336, also  
223 heterolactic fermentation (P122-PWY; produces ethanol and lactate) was more often encoded in  
224 the FLI-associated clade (3/5) than the opposing clade (1/2). In representative genomes from the  
225 non-liver-specific balance n355, potential ethanol producers (PWY-6587) were seen in the  
226 positively associated clade, but for most balances such trends were not clear in the qualitative  
227 analysis. Furthermore, we did not detect any of these pathways in the representative genomes of  
228 two individual taxa positively associated with FLI, *Negativibacillus sp000435195* and *Phoceia*  
229 *massiliensis* (**Figure S3**).

230

## 231 **Discussion**

232 The pathophysiology of fatty liver disease in general, and NAFLD in particular, is complex and  
233 its clinical diagnosis can be difficult.<sup>30</sup> In this study, we leveraged multi-omics data from a  
234 large population study (FINRISK02) to identify broad links between the overall gut  
235 microbiome composition and fatty liver disease, using FLI as a recognized proxy (**Figure 1C**),  
236 and identified specific microbial taxa and lineages predictive of a higher FLI (**Figure 2**).

237 Considering that the predictive ability of FLI for clinically diagnosed NAFLD ranges between  
238 AUC = 0.81 – 0.93, in populations of Caucasian ethnicity such as ours,<sup>23</sup> our models were able  
239 to reasonably predict the FLI group with AUC = 0.75 (AUPRC = 0.56, baseline at 0.30), while  
240 extrapolating to a validation region not used in training of the model.

241

242 Our additional analyses support these results. Excluding participants with intermediate FLI  
243 (between 30 – 60) increased the accuracy slightly (to AUC = 0.8 and AUPRC = 0.75, baseline

244 at 0.41). However, discerning between participants with probable fatty liver disease (FLI  $\geq$  60)  
245 from others presents a clinically more relevant target for detecting changes in microbiome  
246 composition associated with development of the disease. In another set of models, we negated  
247 the influence of validation region data in the individual models also for feature selection and  
248 hyperparameter optimization during training. This led to individualized sets of features and  
249 parameters in the models, but the average performance of the models was almost identical on  
250 validation region samples in the test data (AUC = 0.75 and AUPRC 0.57, baseline at 0.30). The  
251 aim of our study was to find patterns in microbiome composition which would be generalizable  
252 across the 6 sampled geographic regions in Finland and easy to interpret. Thus, we consider the  
253 use of all training data to define the common core feature set justified. This goal also guided  
254 our overall modeling architecture and likely led to a lower performance than if we instead  
255 performed interpolation within a smaller scale (see *e.g.*, ref. 31).

256

257 When interpreting results, several different levels of associations can be considered according  
258 to types of fatty liver disease and the gut microbiome composition. Because FLI has been  
259 mostly validated with simple steatosis and NAFLD,<sup>23,26</sup> we can conservatively contextualize  
260 our findings with previous associative work that used these diagnoses or clinical  
261 manifestations, only.

262

### 263 *FLI modeling reveals consistent associations between gram-positive Clostridia and* 264 *fatty liver disease*

265 We found significant linear correlations between the first three bacterial PC-axes of our  
266 samples (a measure of beta diversity) and FLI (see results and **Figure 1C**). Previous studies

267 have shown differences in beta diversity in relation to NAFLD.<sup>32</sup> However, FLI used in our  
268 study as a proxy for liver disease also includes features such as BMI and waist circumference,  
269 which associate with metabolic syndrome and type 2 diabetes.<sup>16</sup> Links between these diseases  
270 and gut microbiome composition are well documented in previous studies.<sup>33</sup> It is thus not  
271 surprising that bacterial beta diversity and FLI were correlated, but unfortunately this simple  
272 correlation does not enable untangling the relative contributions of fatty liver disease and other  
273 metabolic diseases to the differences in bacterial beta diversity.

274

275 Several studies have reported highly specific changes in microbial abundances in relation to  
276 NAFLD.<sup>12,34–36</sup> In summary, while also conflicting results have been reported, generally  
277 increases in *Lactobacillus* and *Escherichia* genera, and a decrease in *Coprococcus* genus have  
278 been most often associated with a NAFLD diagnosis.<sup>37</sup> Furthermore, increased abundance of  
279 several gram-positive bacteria belonging to the *Clostridium* genus have often been positively  
280 linked with NAFLD.<sup>14,38</sup> Differences in unconstrained between-samples (beta) diversity have  
281 been also documented for persistent NAFLD,<sup>32</sup> and along the NAFLD-cirrhosis spectrum.<sup>8</sup>

282

283 In our study, abundances of bacteria from the *Coprococcus* genus were not specifically  
284 associated with FLI, although the genus was nested inside our predictive balances. Strikingly,  
285 we did not identify any bacterial associations with FLI outside of the *Firmicutes* phylum. A  
286 possible reason for this might be the higher relative abundance of phylum *Firmicutes* at high  
287 latitudes, where Finland is.<sup>39</sup> Among the associations we identified, *Faecalicatena gnavus*  
288 (NCBI: *Ruminococcus gnavus*) was positively linked with FLI as part of 3 predictive balances,  
289 and associated in previous studies with liver cirrhosis.<sup>17</sup> Interestingly, none of the oral

290 *Firmicutes*, such as *Veillonella*, suggested to invade the gut, were identified in our own  
291 analyses. This might be caused by using FLI as a proxy, which is likely not closely associated  
292 with advanced liver disease, such as cirrhosis, and thus would target an earlier phase of liver  
293 disease progression.

294

295 Two individual taxa, *Negativibacillus sp000435195* and *Phoceia massiliensis*, were highly  
296 predictive of FLI group (**Figures 2, S2**), but not of its liver function-specific components. The  
297 associations of these taxa with fatty liver disease have not been documented previously.

298 However, a decreasing abundance of both bacteria, *Negativibacillus sp000435195* (NCBI:  
299 *Clostridium sp. CAG:169*) and *Phoceia massiliensis* (NCBI: *Phoceia massiliensis*), were seen  
300 when the intake of meat and refined cereal was reduced isocalorically in favor of fruit,  
301 vegetables, wholegrain cereal, legumes, fish and nuts in overweight and obese subjects in  
302 Italy.<sup>40</sup> While comparisons between these studies are difficult due to annotation, bacteria such  
303 as *Faecalicatena gnavus* (NCBI: *Ruminococcus gnavus*) and *Clostridium Q saccharolyticum*  
304 (NCBI: *Clostridium saccharolyticum*) were also found to respond negatively to the  
305 Mediterranean diet. Together with their positive association with FLI in our study, these  
306 observations would warrant further study on these species as plausible biomarkers for healthy  
307 diet choices.

308

309 Most taxa in our study with a positive association with FLI belonged to the (broadly defined)  
310 *Clostridium* NCBI genus, which supports several previous observations.<sup>14,38</sup> However,  
311 taxonomic standardization according to GTDB has identified the *Clostridium* genus as the most  
312 phylogenetically inconsistent of all bacterial genera in the NCBI taxonomy, and divides it into

313 a total of 121 monophyletic genera in 29 distinct families.<sup>28</sup> These reassignments, although  
314 more accurate and sensible, complicate comparisons to previous research studies. However, our  
315 results strongly suggest that this finer taxonomic resolution might robustly reveal novel  
316 discoveries. Thus, while (shallow) shotgun metagenomic sequencing is often more costly than  
317 amplicon sequencing, this might be justified by the increased resolution which is required to  
318 accurately identify specific taxon-based associations (see *e.g.*, refs. 27,41).

319

320 ***Bacterial taxa associated with a high FLI have a genetic potential to exacerbate the***  
321 ***development of fatty liver disease***

322 We identified several plausible new associations between individual taxa and clades of bacteria  
323 and fatty liver. All taxa were from class *Clostridia*, which are obligate anaerobes. We observed  
324 that reference genomes from the bacterial taxa positively associated with FLI in the liver-  
325 specific balances harbored several genetic pathways necessary for ethanol production.  
326 Specifically, genes predicted to enable the fermentation of pyruvate to ethanol (MetaCyc PWY-  
327 6587) appeared to be common. Endogenous production of ethanol has been known to both  
328 induce hepatic steatosis and increase intestinal permeability,<sup>42</sup> and several of the taxa identified  
329 in our study have also been experimentally shown to produce ethanol, such as *C. M*  
330 *asparagiforme*, *C. M bolteae*, *C. M clostridioforme* / *C. M clostridioforme A*<sup>43</sup>, and *C. Q*  
331 *Saccharolyticum*.<sup>44</sup> The relative abundances of these putatively ethanol-producing taxa were  
332 predictive of FLI groups in previously unseen data. However, the self-reported alcohol  
333 consumption from the participants was not among the best predictors for the FLI groups, as it  
334 was excluded in the feature selection step.

335

336 All reference genomes from taxa positively associated with FLI in balance n330 harboured  
337 genes predicted to encode for the L-glutamate fermentation V (P162-PWY; **Figure S3**)  
338 pathway, which results in the production of acetate and butanoate. Glutamate fermentation  
339 could lead to increased microbial protein fermentation in the gut, which has been previously  
340 been linked with obesity, diabetes and NAFLD.<sup>45</sup> Recently, the combined intake of fructose  
341 and microbial acetate production in the gut was experimentally observed to contribute to  
342 lipogenesis in the liver in a mouse model.<sup>46</sup> Interestingly, *C. Q saccharolyticum* (in our study, a  
343 FLI-associated species deriving from balance n330), was experimentally shown to ferment  
344 various carbohydrates, including fructose, to acetate, hydrogen, carbon dioxide, and ethanol.<sup>44</sup>  
345 Furthermore, while our own pathway analysis did not detect BA modification pathways in the  
346 reference genome of *C. Q saccharolyticum*, a strain of this species has been highlighted as a  
347 probable contributor to NAFLD development through the synthesis of secondary BA.<sup>15</sup> The  
348 links between dietary intake and gene regulation, combined with microbial fermentation in the  
349 gut warrant further mechanistic experiments to elucidate their links with fatty liver, and likely  
350 other metabolic diseases.

351

352 Intriguingly, NAFLD-associated ethanol producing bacteria in previous cohort studies have all  
353 been gram-negatives, such as (NCBI-defined) *Klebsiella pneumoniae*,<sup>13</sup> and *Escherichia coli*.<sup>12</sup>  
354 In our population sample, instead of gram-negatives, bacteria from the *C. M bolteae*, *C. M*  
355 *clostridioforme* / *C. M clostridioforme A* and *C. M citroniae* species (linked in our study with  
356 FLI as deriving from balance n336) have been described as opportunistic pathogens,<sup>47</sup> and are  
357 hypothesized to exacerbate fatty liver development similarly through endogenous ethanol  
358 production. This result suggests that geographical,<sup>31</sup> and ethnic variability,<sup>48</sup> might also

359 strongly affect gut microbiome composition and its associations with disease. In addition to  
360 putative endogenous ethanol producers, we identified other FLI-associated taxa deriving from  
361 balance n330, for which reference genomes harbored a genetic pathway predicted to encode for  
362 the ability to ferment L-lysine to acetate and butyrate. While the production of these SCFAs is  
363 often considered beneficial for gut health, other metabolism of proteolytic bacteria might  
364 negatively contribute to fatty liver disease.<sup>49</sup>

365

366 Through modeling a previously validated risk index for fatty liver, we could associate specific  
367 members of the gut microbiome with the disease across geographical regions in this  
368 representative sample of the general population in Finland. In addition, sex and age of  
369 participants were also strongly predictive of the FLI group in our models (**Figures 2, S2, Table**  
370 **S1**). Their similar positive associations with fatty liver disease are known from previous  
371 studies.<sup>50,51</sup> The associated microbial balances could be used to improve the predictions above  
372 the baseline of these covariates on 5/6 regions in Finland. For example, in the model cross-  
373 validated with Lapland the balances were more predictive of FLI group than the covariates by  
374 themselves, and their combination increased the AUC further. Yet, when testing the model  
375 where Turku/Loimaa region was used for cross-validation, the microbial balances were slightly  
376 predictive of FLI group but failed to improve the AUC over the covariates (**Table S1**). This  
377 pattern might stem from the cultural and genetic west-east division in Finland,<sup>52,53</sup> with a closer  
378 proximity of the Helsinki/Vantaa region to eastern regions than Turku/Loimaa, in both terms. It  
379 is thus likely that further incorporation and investigation on the use of spatial information in  
380 microbiome modeling would elucidate these geographical patterns in taxa-disease associations.  
381



## 382 ***Conclusions***

383 Modeling an established risk index for fatty liver enabled the detection of associations between  
384 the disease and gut microbiome composition, even to the level of individual taxa. These taxa  
385 and clades were all from the obligately anaerobic gram-positive class *Clostridia*, from several  
386 redefined GTDB genera previously included in the polyphyletic NCBI genus *Clostridium*.  
387 Many of the representative genomes of taxa positively associated with fatty liver had genomic  
388 potential for endogenous ethanol production. This suggests a possible mechanistic link to the  
389 pathophysiology of liver disease through increased gut permeability and induction of hepatic  
390 steatosis. Further mechanistic links with microbial production of SCFAs, especially acetate,  
391 and fatty liver development are also likely. Our models were able to predict the FLI group of  
392 participants across geographical regions in Finland, showing that the associations are robust  
393 and mostly generalizable in the sampled population.

394

## 395 **Materials and Methods**

### 396 ***Survey details and sample collection***

397 Cardiovascular disease risk factors have been monitored in Finland since 1972 by conducting a  
398 representative population survey every five years.<sup>54</sup> In the FINRISK 2002 survey, a stratified  
399 random population sample was conducted on six geographical regions in Finland. These are  
400 North Karelia and Northern Savo in eastern Finland, Turku and Loimaa regions in southwestern  
401 Finland, the cities of Helsinki and Vantaa in the capital region, the provinces of Northern  
402 Ostrobothnia and Kainuu in northwestern Finland, and the province of Lapland in northern  
403 Finland. The Coordinating Ethics Committee of the Helsinki University Hospital District

404 approved our study protocol (Ref. 558/E3/2001) and all participants have given their written  
405 informed consent.

406

407 Briefly, at baseline examination the participants filled out a questionnaire form, and trained  
408 nurses carried out a physical examination and blood sampling in local health centers or other  
409 survey sites. Data was collected for physiological measures, biomarkers, and dietary,  
410 demographic and lifestyle factors. Stool samples were collected by giving willing participants a  
411 stool sampling kit with detailed instructions. These samples were mailed overnight between  
412 Monday and Thursday under Finnish winter conditions to the laboratory of the Finnish Institute  
413 for Health and Welfare, where they were stored at -20°C. In 2017, the samples were shipped still  
414 unthawed to University of California San Diego for microbiome sequencing.

415

416 Further details of the FINRISK cohorts and sampling have been extensively covered in previous  
417 publications (for details, see refs. 24,55). The Coordinating Ethics Committee of the Helsinki  
418 University Hospital District approved our study protocol. All participants have given their  
419 written informed consent.

420

#### 421 ***Stool DNA extraction and shallow shotgun metagenome sequencing***

422 A miniaturized version of the Kapa HyperPlus Illumina-compatible library prep kit (Kapa  
423 Biosystems) was used for library generation, following the previously published protocol.<sup>56</sup>  
424 DNA extracts were normalized to 5 ng total input per sample in an Echo 550 acoustic liquid  
425 handling robot (Labcyte Inc). A Mosquito HV liquid-handling robot (TTP Labtech Inc was used  
426 for 1/10 scale enzymatic fragmentation, end-repair, and adapter-ligation reactions). Sequencing

427 adapters were based on the iTru protocol,<sup>57</sup> in which short universal adapter stubs are ligated first  
428 and then sample-specific barcoded sequences added in a subsequent PCR step. Amplified and  
429 barcoded libraries were then quantified by the PicoGreen assay and pooled in approximately  
430 equimolar ratios before being sequenced on an Illumina HiSeq 4000 instrument to an average  
431 read count of approximately 900,000 reads per sample.

432

### 433 *Taxonomic matching and phylogenetic transforms*

434 To improve the taxonomic assignments of our reads, we used a custom index,<sup>58</sup> based on the  
435 Genome Taxonomy Database (GTDB) release 89 taxonomic redefinitions,<sup>28,59</sup> for read  
436 classification with default parameters in Centrifuge 1.0.4.<sup>60</sup> After read classification, all  
437 following steps were performed with R version 3.5.2.<sup>61</sup> To reduce the number of spurious read  
438 assignments, and to facilitate more accurate phylogenetic transformations, only reads classified  
439 at the species level, matching individual GTDB reference genomes, were retained. Samples with  
440 less than 50,000 reads, from pregnant participants or recorded antibiotic use in the past 6 months  
441 were removed, resulting in a final number of 6,269 samples. We first filtered taxa not seen with  
442 more than 3 counts in at least 1% of samples and those with a coefficient of variation  $\leq 3$  across  
443 all samples, following McMurdie and Holmes<sup>62</sup>, with a slight adaption from 20% of samples to  
444 1% of samples, because of our larger sample size. The complete bacterial and archaeal  
445 phylogenetic trees of the GTDB release 89 reference genomes, constructed from an alignment of  
446 120 bacterial or 122 archaeal marker genes,<sup>28</sup> were then combined with our taxa tables. The  
447 resulting trees were thus subset only to species which were observed in at least one sample in our  
448 data. The read counts were transformed to phylogenetic node balances in both trees with

449 PhILR.<sup>29</sup> The default method for PhILR inputs a pseudocount of 1 for taxa absent in an  
450 individual sample before the transform.

451

452 In this study, we did not specifically and solely use relative abundances at various taxonomic  
453 levels, as is common practice for microbiome studies. Instead, we applied a PhILR  
454 transformation to our microbial composition data,<sup>29</sup> introducing the concept of microbial  
455 “balances”. Indeed, evolutionary relationships of all species harbored in each microbiome  
456 sample can be represented on a phylogenetic tree, with species typically shown as external nodes  
457 that are related to each other by multiple branches connected by internal nodes. In this context,  
458 the value of a given microbial “balance” is defined as the log-ratio of the geometric mean  
459 abundance between two groups of microbes descending from the same corresponding internal  
460 node on a microbial phylogenetic tree. This phylogenetic transform was used because it i)  
461 addresses the compositionality of the metagenomic read data,<sup>63</sup> ii) permits simultaneous  
462 comparison of all clades without merging the taxa by predefined taxonomic levels, and iii)  
463 enables evolutionary insights into the microbial community. The links between microbes and  
464 their environment, such as the human gut, is mediated by their functions. Different functions are  
465 known to be conserved at different taxonomic resolutions, and most often at multiple different  
466 resolutions.<sup>64</sup> Thus, associations between the microbes and the response variable are likely not  
467 best explained by predefined taxonomic levels. In the absence of functional data, concurrently  
468 analyzing all clades (partitioned by the nodes in the phylogenetic tree) would likely enable the  
469 detection of the associations at the appropriate resolution depending on the function and the local  
470 tree topography.

471

## 472 *Covariates*

473 Because fatty liver disease is underdiagnosed at the population level,<sup>25</sup> and our sampling did not  
474 have extensive coverage of liver fat measurements, we chose to use the Fatty Liver index as a  
475 proxy for fatty liver.<sup>26</sup> Furthermore, the index performs well in cohorts of Caucasian ethnicity,  
476 such as ours, to diagnose the presence of NAFLD.<sup>23</sup> We calculated FLI after Bedogni et al.<sup>26</sup>:

477  $(e^{0.953 \cdot \log_e(\text{triglycerides mg/dL}) + 0.139 \cdot \text{BMI} + 0.718 \cdot \log_e(\text{GGT}) + 0.053 \cdot \text{waist circumference} - 15.745}) /$

478  $(1 + e^{0.953 \cdot \log_e(\text{triglycerides mg/dL}) + 0.139 \cdot \text{BMI} + 0.718 \cdot \log_e(\text{GGT}) + 0.053 \cdot \text{waist circumference} - 15.745}) * 100$ . We chose

479 the cutoff at  $\text{FLI} \geq 60$  to identify participants likely to be diagnosed with hepatic steatosis

480 (positive likelihood ratio = 4.3 and negative likelihood ratio = 0.5, after Bedogni et al.<sup>26</sup>).

481 Triglycerides, gamma glutamyl transferase (GGT), BMI and waist circumference measurements

482 had near complete coverage for the participants in our data. Self-reported alcohol use was

483 calculated as grams of pure ethanol per week. Cases with missing values were omitted in linear

484 regression models. At least one feature used for FLI calculation was missing for 20 participants

485 (0.3%) and the self-reported alcohol use was missing for 247 participants (3.9%). In the machine

486 learning framework, missing values for FLI and self-reported alcohol use were mean imputed.

487 However, for the feature selection to identify liver function-specific balances, GGT, triglycerides

488 and BMI were not imputed but observations where any of these were missing were simply

489 removed.

490

## 491 *Beta-diversity and linear modeling of FLI*

492 Beta-diversity was calculated as Euclidian distance of the PhILR balances through Principal

493 Component Analysis (PCA) on bacterial and archaeal balances separately with “rda” in vegan

494 2.5.6.<sup>65</sup> A linear regression model was constructed for FLI with “lm” in base R,<sup>61</sup> with  $\log_{10}$ -

495 transformed FLI as the dependent variable and with first three bacterial PCs, sex, age, and self-  
496 reported alcohol use as the independent variables. Archaeal PCs were dropped from the model  
497 because none of them were significantly correlated with FLI (all  $P > 0.05$ ). Variation of the  
498 samples on the top two bacterial PC axes by their effect sizes in the model were plotted together  
499 with a unit vector of  $\log_{10}(\text{FLI})$  to show their correlation.

500

### 501 ***FLI modeling within a machine learning framework***

502 In the machine learning framework, both regression and categorical models were constructed for  
503 FLI. The feature selection, hyperparameter optimization and cross-validation methods were  
504 identical for both approaches, unless otherwise stated. The continuous or categorical FLI (groups  
505 of  $\text{FLI} < 60$  and  $\text{FLI} \geq 60$ ) were modeled with xgboost 0.90.0.2,<sup>66</sup> by using both bacterial and  
506 archaeal balances, sex, age, and self-reported alcohol use as preliminary predictor features. We  
507 used FLI 60 as the cutoff for ruling in fatty liver (steatosis) for the classification, after Bedogni et  
508 al., (2006). The data was first split to 70% train and 30% test sets while preserving sex and  
509 region balance. To take into account geographical differences (see *e.g.*, ref. 31) and to find robust  
510 patterns across all 6 sampled regions in Finland between the features and FLI group, we used  
511 Leave-One-Group-Out Cross-Validation (LOGOCV) inside the 70% train set to construct 6  
512 separate models in each optimization step. Because of high dimensionality of the data (3423  
513 predictor features) feature selection by filtering was first performed inside the training data,  
514 based on random forest permutation as recommended by Bommert et al.<sup>67</sup> Briefly, permutation  
515 importance is based on accuracy, or specifically the difference in accuracy between real and  
516 permuted (random) values of the specific variable, averaged in all trees across the whole random  
517 forest. The permutation importance in models based on the 6 LOGOCV subsets of the training

518 data were calculated with mlr 2.16.0,<sup>68</sup> and the simple intersect between the top 50 features in all  
519 LOGOCV subsets were retained as the final set of features. Thus, the feature selection was  
520 influenced by the training data from all 6 geographical regions, but this only serves to limit the  
521 number of chosen features because of the required simple intersect. This approach was used to  
522 obtain a set of core predictive features which would have potential for generalizability across the  
523 regions. The number of features included in the models by this approach was deemed  
524 appropriate, since the relative effect size of the last included predictor was very small ( $< 0.1$   
525 change in classification probability across its range).

526

527 Bayesian hyperparameter optimization of the xgboost models was then performed with only the  
528 selected features. An optimal set of parameters for the xgboost models were searched over all  
529 LOGOCV subsets with “mbo” in mlrMBO 1.1.3,<sup>69</sup> using 30 preliminary rounds with randomized  
530 parameters, followed by 100 optimization rounds. Parameters in the xgboost models and their  
531 considered ranges were learning rate (eta) [0.001, 0.3], gamma [0.1, 5], maximum depth of a tree  
532 [2, 8], minimum child weight [1, 10], fraction of data subsampled per each iteration [0.2, 0.8],  
533 fraction of columns subsampled per tree [0.2, 0.9], and maximum number of iterations (nrounds)  
534 [50, 5000]. The parameters recommended by these searchers were as following for regression:  
535 eta=0.00889; gamma=2.08; max\_depth=2; min\_child\_weight=8; subsample=0.783;  
536 colsample\_bytree=0.672; nrounds=1810, and for classification: eta=0.00107; gamma=0.137;  
537 max\_depth=5; min\_child\_weight=9; subsample=0.207; colsample\_bytree=0.793; nrounds=4328.

538 We used Root-Mean-Square Error (RMSE) for the regression models and Area Under the ROC  
539 Curve (AUC) for the classification models to measure model fit on the left-out data (region) in  
540 each LOGOCV subset. The final models were trained on the LOGOCV subset training data, the

541 data from one region thus omitted per model, and using the selected features and optimized  
542 hyperparameters. Validation of these models was conducted against participants only from the  
543 region omitted from each model, in the 30% test data which was not used in model training or  
544 optimization. Sensitivity analysis was conducted by using only the predictive covariates (sex and  
545 age) or balances separately, with the same hyperparameters, data partitions and final validation  
546 as for the full models.

547

### 548 ***Partial dependence interpretation of the FLI classification models***

549 Because the classification models have a more clinically relevant modeling target for the  
550 difference between  $FLI < 60$  and  $FLI \geq 60$ , the latter used to rule in fatty liver,<sup>26</sup> we further  
551 interpreted the partial dependence of their predictions. Partial dependence of the classification  
552 model predictions on individual features was calculated with “partial” in pdp 0.7.0.<sup>70</sup> The partial  
553 dependence of the features on the model predictions was also plotted, overlaying the results from  
554 each of the 6 models. For each feature, its relative effect on the model prediction was estimated  
555 as medians of the minimum and maximum  $\hat{y}$  (output probability of the model for the  $FLI \geq 60$   
556 class), calculated at the minimum and maximum values of the feature separately in each of the 6  
557 models. The relative effects of the balances were then overlaid as a heatmap on a genome  
558 cladogram which covers all balances in the model with ggtree 2.1.1.<sup>71</sup>

559

### 560 ***Construction of alternative classification models to discern between***

#### 561 ***FLI < 30 and FLI $\geq$ 60 groups***

562 To assess robustness of the models and how removing the participants with intermediate FLI  
563 (between 30 and 60) affects model performance, we removed this group ( $N = 1910$ ) and



564 constructed alternative classification models to discern between the  $FLI < 30$  and  $FLI \geq 60$   
565 groups. Other than removing the intermediate FLI participants and resulting new random split to  
566 the train (70%) and test (30%) sets, these models were constructed identically to the main  
567 models, including LOGOCV design, feature selection, and hyperparameter optimization. The  
568 recommended parameters for this classification task were  $\eta=0.00102$ ;  $\gamma=3.7$ ;  
569  $\max\_depth=2$ ;  $\min\_child\_weight=5$ ;  $subsample=0.49$ ;  $colsample\_bytree=0.631$ ;  $nrounds=3119$ .  
570 Interpretation of partial dependence was also performed identically, but only the relative effects  
571 of the model features were plotted without a cladogram.

572

573 ***Exclusion of validation region data from feature selection and hyperparameter***  
574 ***optimization***

575 Because training data from all 6 regions is used to inform the selection of optimal features and  
576 hyperparameters, the validation region data cannot be considered completely independent from  
577 the training of the LOGOCV models. Thus, we constructed a set of classification models for the  
578  $FLI \geq 60$  and  $FLI < 60$  groups, where all validation region samples also in the training data were  
579 excluded from the simple intercept of top 50 features in each LOGOCV set and from the  
580 subsequent hyperparameter optimization. These models with individualized features and  
581 hyperparameters were then tested on the validation region samples in the unseen test data to  
582 estimate how model performance was affected. The main test (70%) and train (30%) sets were  
583 identical to the main models, but additionally 6 randomized 70/30 splits nested inside the test set  
584 (excluding the validation region) were used in hyperparameter optimization to reduce overfitting.  
585 Average optimal hyperparameters in the 6 models were  $\eta=0.00106$ ;  $\gamma=4.3$ ;  
586  $\max\_depth=2$ ;  $\min\_child\_weight=7$ ;  $subsample=0.36$ ;  $colsample\_bytree=0.613$ ;  $nrounds=1772$ .

587

### 588 ***Identification of predictive features specific to liver function***

589 Because the FLI also incorporates BMI and waist circumference, and they strongly contribute to  
590 the index,<sup>26</sup> we deemed it necessary to further investigate which of the identified balances were  
591 specific to liver function. The participants were first grouped by age (< 40, 40 – 60, and 60 <),  
592 sex (female or male) and BMI (< 25, 25 – 30, and 30 <) into 18 categories ( $N = 105 \sim 711$  per  
593 category). We performed feature selection similarly to the FLI models by fitting random forest  
594 regressors for GGT and triglycerides with mlr 2.16.0.<sup>68</sup> This was done separately in each of the  
595 18 categories, and in each category, we again used LOGOCV with the regions to obtain 6 runs  
596 per category. Finally, the features predictive of GGT or triglycerides in each category were  
597 selected as the intersect of top 50 features in the 6 LOGOCV iterations by permutation  
598 importance. The intersect of features predictive of GGT or triglycerides in any of the categories  
599 and the features predictive of categorical FLI were identified as specific to liver function.

600

### 601 ***Pathway inference for taxa associated with FLI***

602 Our taxonomic matching of the reads is based on the genomes of GTDB (release 89),<sup>28</sup> which are  
603 all complete or nearly complete and available in online databases. This enables us to estimate the  
604 likely genetic content, and thus, the metabolic potential of the microbes associated with FLI. We  
605 use this approach because the sequencing depth of our samples does not allow assembling  
606 contigs and (metagenome-assembled) genomes, required for pathway predictions. Because of the  
607 compositional phylogenetic transform, among other features of our data, previously developed  
608 approaches such as PICRUSt,<sup>72</sup> could not be used here.

609

610 The genomes of all 336 bacteria under at least one of the predictive balances were downloaded  
611 from NCBI. 119 of these genomes were originally not annotated, which is a requirement for  
612 pathway prediction. Therefore, Prokka v1.14.6,<sup>73</sup> was used to annotate the 119 unannotated  
613 genomes as a preliminary step. Pathway predictions were then performed for all 336 genomes  
614 with mpwt v0.5.3 multiprocessing tool,<sup>74</sup> for the PathoLogic pipeline of Pathway Tools 23.0.<sup>75</sup>  
615 Pathways for ethanol and short chain fatty acid (acetate, butyrate, propionate) production, bile  
616 acid metabolism, and choline degradation to trimethylamine were identified from MetaCyc  
617 pathway classifications (see ref. 76, and **Table S4**). The prevalence of these processes was then  
618 assessed in the analyzed genomes and summarized per process to consider the possible links of  
619 the taxa with fatty liver pathophysiology. Finally, the presence of individual pathways for acetate  
620 and ethanol production was also outlined for each genome.

621

#### 622 *Data availability statement*

623 The analysis code written for this study is included with the Supplementary Information. The  
624 datasets generated during and analyzed during the current study are not public, but are available  
625 based on a written application to the THL Biobank as instructed in: [https://thl.fi/en/web/thl-](https://thl.fi/en/web/thl-biobank/for-researchers)  
626 [biobank/for-researchers](https://thl.fi/en/web/thl-biobank/for-researchers)

627

#### 628 *Disclosure of interest*

629 V.S. has consulted for Novo Nordisk and Sanofi and received honoraria from these companies.  
630 He also has ongoing research collaboration with Bayer AG, all unrelated to this study. R.L.  
631 serves as a consultant or advisory board member for Anylam/Regeneron, Arrowhead  
632 Pharmaceuticals, AstraZeneca, Bird Rock Bio, Boehringer Ingelheim, Bristol-Myer Squibb,

633 Celgene, Cirius, CohBar, Conatus, Eli Lilly, Galmed, Gemphire, Gilead, Glympse bio, GNI, GRI  
634 Bio, Inipharm, Intercept, Ionis, Janssen Inc., Merck, Metacrine, Inc., NGM Biopharmaceuticals,  
635 Novartis, Novo Nordisk, Pfizer, Prometheus, Promethera, Sanofi, Siemens, and Viking  
636 Therapeutics. In addition, his institution has received grant support from Allergan, Boehringer-  
637 Ingelheim, Bristol-Myers Squibb, Cirius, Eli Lilly and Company, Galectin Therapeutics, Galmed  
638 Pharmaceuticals, GE, Genfit, Gilead, Intercept, Grail, Janssen, Madrigal Pharmaceuticals,  
639 Merck, NGM Biopharmaceuticals, NuSirt, Pfizer, pH Pharma, Prometheus, and Siemens. He is  
640 also co-founder of Liponexus, Inc.

641

#### 642 ***Funding details***

643 This research was supported in part by grants from the Finnish Foundation for Cardiovascular  
644 Research, the Emil Aaltonen Foundation, the Paavo Nurmi Foundation, the Urmas Pekkala  
645 Foundation, the Finnish Medical Foundation, the Sigrid Juselius Foundation, the Academy of  
646 Finland (#321356 to A.H.; #295741, #307127 to L.L.; #321351 to T.N.) and the National  
647 Institutes of Health (R01ES027595 to M.J.). R.L. receives funding support from NIEHS  
648 (5P42ES010337), NCATS (5UL1TR001442), NIDDK (U01DK061734, R01DK106419,  
649 P30DK120515, R01DK121378, R01DK124318), and DOD PRCRP (W81XWH-18-2-0026).  
650 Additional support was provided by Illumina, Inc. and Janssen Pharmaceutica through their  
651 sponsorship of the Center for Microbiome Innovation at UCSD.

652

#### 653 ***Authors' contributions***

654 M.R., F.Å., V.M., V.S., R.K., L.L and T.N designed the work. A.H., L.V., G.M., P.J., V.S., M.J  
655 and R.K. acquired the data. M.R., L.L. and T.N. analyzed the data. M.R. wrote the manuscript in

656 consultation with all authors. M.I., P.J., V.S., R.K., L.L. and T.N. supervised the work. All  
657 authors gave final approval of the version to be published.

658

### 659 *Acknowledgements*

660 We thank all participants of the FINRISK 2002 survey for their contributions to this work, and  
661 Tara Schwartz for assistance with laboratory work.

662

### 663 **References**

- 664 1. Younossi ZM, Koenig AB, Abdelatif D, Fazel Y, Henry L, Wymer M. Global  
665 epidemiology of nonalcoholic fatty liver disease—Meta-analytic assessment of prevalence,  
666 incidence, and outcomes. *Hepatology* 2016; 64:73–84.
- 667 2. Marchesini G, Bugianesi E, Forlani G, Cerrelli F, Lenzi M, Manini R, Natale S, Vanni E,  
668 Villanova N, Melchionda N, et al. Nonalcoholic fatty liver, steatohepatitis, and the  
669 metabolic syndrome. *Hepatology* 2003; 37:917–23.
- 670 3. Chalasani N, Younossi Z, Lavine JE, Diehl AM, Brunt EM, Cusi K, Charlton M, Sanyal  
671 AJ. The diagnosis and management of non-alcoholic fatty liver disease: Practice Guideline  
672 by the American Association for the Study of Liver Diseases, American College of  
673 Gastroenterology, and the American Gastroenterological Association. *Hepatology* 2012;  
674 55:2005–23.
- 675 4. Yki-Järvinen H. Non-alcoholic fatty liver disease as a cause and a consequence of  
676 metabolic syndrome. *Lancet Diabetes Endocrinol* 2014; 2:901–10.
- 677 5. Toshikuni N, Tsutsumi M, Arisawa T. Clinical differences between alcoholic liver disease  
678 and nonalcoholic fatty liver disease. *World J Gastroenterol* 2014; 20:8393–406.
- 679 6. Rinella M, Charlton M. The globalization of nonalcoholic fatty liver disease: Prevalence  
680 and impact on world health. *Hepatology* 2016; 64:19–22.
- 681 7. Gilbert JA, Blaser MJ, Caporaso JG, Jansson JK, Lynch SV, Knight R. Current  
682 understanding of the human microbiome. *Nat Med* 2018; 24:392–400.
- 683 8. Caussy C, Tripathi A, Humphrey G, Bassirian S, Singh S, Faulkner C, Bettencourt R, Rizo  
684 E, Richards L, Xu ZZ, et al. A gut microbiome signature for cirrhosis due to nonalcoholic  
685 fatty liver disease. *Nature Communications* 2019; 10:1406.

- 686 9. Compare D, Coccoli P, Rocco A, Nardone OM, De Maria S, Carteni M, Nardone G. Gut–  
687 liver axis: The impact of gut microbiota on non alcoholic fatty liver disease. *Nutrition,*  
688 *Metabolism and Cardiovascular Diseases* 2012; 22:471–6.
- 689 10. Miele L, Valenza V, Torre GL, Montalto M, Cammarota G, Ricci R, Mascianà R, Forgione  
690 A, Gabrieli ML, Perotti G, et al. Increased intestinal permeability and tight junction  
691 alterations in nonalcoholic fatty liver disease. *Hepatology* 2009; 49:1877–87.
- 692 11. Spencer MD, Hamp TJ, Reid RW, Fischer LM, Zeisel SH, Fodor AA. Association Between  
693 Composition of the Human Gastrointestinal Microbiome and Development of Fatty Liver  
694 With Choline Deficiency. *Gastroenterology* 2011; 140:976–86.
- 695 12. Zhu L, Baker SS, Gill C, Liu W, Alkhoury R, Baker RD, Gill SR. Characterization of gut  
696 microbiomes in nonalcoholic steatohepatitis (NASH) patients: A connection between  
697 endogenous alcohol and NASH. *Hepatology* 2013; 57:601–9.
- 698 13. Yuan J, Chen C, Cui J, Lu J, Yan C, Wei X, Zhao X, Li N, Li S, Xue G, et al. Fatty Liver  
699 Disease Caused by High-Alcohol-Producing *Klebsiella pneumoniae*. *Cell Metabolism*  
700 2019; 30:675-688.e7.
- 701 14. Loomba R, Seguritan V, Li W, Long T, Klitgord N, Bhatt A, Dulai PS, Caussy C,  
702 Bettencourt R, Highlander SK, et al. Gut Microbiome-Based Metagenomic Signature for  
703 Non-invasive Detection of Advanced Fibrosis in Human Nonalcoholic Fatty Liver Disease.  
704 *Cell Metabolism* 2017; 25:1054-1062.e5.
- 705 15. Jiao N, Wu D, Yang Z, Fang S, Li X, Yuan M, Zhu R, Zhu L. Gut bacteria contributes to  
706 NAFLD pathogenesis by promoting secondary bile acids biosynthesis. *The FASEB Journal*  
707 2019; 33:126.4-126.4.
- 708 16. Aron-Wisnewsky J, Vigiotti C, Witjes J, Le P, Holleboom AG, Verheij J, Nieuwdorp M,  
709 Clément K. Gut microbiota and human NAFLD: disentangling microbial signatures from  
710 metabolic disorders. *Nature Reviews Gastroenterology & Hepatology* 2020; 17:279–97.
- 711 17. Qin N, Yang F, Li A, Prifti E, Chen Y, Shao L, Guo J, Le Chatelier E, Yao J, Wu L, et al.  
712 Alterations of the human gut microbiome in liver cirrhosis. *Nature* 2014; 513:59–64.
- 713 18. Liu Y, Meric G, Havulinna AS, Teo SM, Ruuskanen M, Sanders J, Zhu Q, Tripathi A,  
714 Verspoor K, Cheng S, et al. Early prediction of liver disease using conventional risk factors  
715 and gut microbiome-augmented gradient boosting [Internet]. *Genetic and Genomic*  
716 *Medicine*; 2020 [cited 2020 Jul 28]. Available from:  
717 <http://medrxiv.org/lookup/doi/10.1101/2020.06.24.20138933>
- 718 19. Safari Z, Gérard P. The links between the gut microbiome and non-alcoholic fatty liver  
719 disease (NAFLD). *Cell Mol Life Sci* 2019; 76:1541–58.
- 720 20. Carpino G, Del Ben M, Pastori D, Carnevale R, Baratta F, Overi D, Francis H, Cardinale V,  
721 Onori P, Safarikia S, et al. Increased liver localization of lipopolysaccharides in human and  
722 experimental non-alcoholic fatty liver disease. *Hepatology* 2019; :hep.31056.

- 723 21. Li Q, Dhyani M, Grajo JR, Sirlin C, Samir AE. Current status of imaging in nonalcoholic  
724 fatty liver disease. *World J Hepatol* 2018; 10:530–42.
- 725 22. Koehler EM, Schouten JNL, Hansen BE, Hofman A, Stricker BH, Janssen HLA. External  
726 Validation of the Fatty Liver Index for Identifying Nonalcoholic Fatty Liver Disease in a  
727 Population-based Study. *Clinical Gastroenterology and Hepatology* 2013; 11:1201–4.
- 728 23. Vanni E, Bugianesi E. Editorial: utility and pitfalls of Fatty Liver Index in epidemiologic  
729 studies for the diagnosis of NAFLD. *Aliment Pharmacol Ther* 2015; 41:406–7.
- 730 24. Salosensaari A, Laitinen V, Havulinna AS, Meric G, Cheng S, Perola M, Valsta L, Alfthan  
731 G, Inouye M, Watrous JD, et al. Taxonomic Signatures of Long-Term Mortality Risk in  
732 Human Gut Microbiota [Internet]. *Epidemiology*; 2020 [cited 2020 Jan 4]. Available from:  
733 <http://medrxiv.org/lookup/doi/10.1101/2019.12.30.19015842>
- 734 25. Alexander M, Loomis AK, Fairburn-Beech J, van der Lei J, Duarte-Salles T, Prieto-  
735 Alhambra D, Ansell D, Pasqua A, Lapi F, Rijnbeek P, et al. Real-world data reveal a  
736 diagnostic gap in non-alcoholic fatty liver disease. *BMC Medicine* 2018; 16:130.
- 737 26. Bedogni G, Bellentani S, Miglioli L, Masutti F, Passalacqua M, Castiglione A, Tiribelli C.  
738 The Fatty Liver Index: a simple and accurate predictor of hepatic steatosis in the general  
739 population. *BMC Gastroenterol* 2006; 6:33.
- 740 27. Hillmann B, Al-Ghalith GA, Shields-Cutler RR, Zhu Q, Gohl DM, Beckman KB, Knight R,  
741 Knights D. Evaluating the Information Content of Shallow Shotgun Metagenomics.  
742 *mSystems* [Internet] 2018 [cited 2020 Apr 9]; 3. Available from:  
743 <https://msystems.asm.org/content/3/6/e00069-18>
- 744 28. Parks DH, Chuvochina M, Waite DW, Rinke C, Skarszewski A, Chaumeil P-A,  
745 Hugenholtz P. A standardized bacterial taxonomy based on genome phylogeny  
746 substantially revises the tree of life. *Nat Biotechnol* 2018; 36:996–1004.
- 747 29. Silverman JD, Washburne AD, Mukherjee S, David LA. A phylogenetic transform  
748 enhances analysis of compositional microbiota data. *eLife* 2017; 6:e21887.
- 749 30. Haas JT, Francque S, Staels B. Pathophysiology and Mechanisms of Nonalcoholic Fatty  
750 Liver Disease. *Annual Review of Physiology* 2016; 78:181–205.
- 751 31. He Y, Wu W, Zheng H-M, Li P, McDonald D, Sheng H-F, Chen M-X, Chen Z-H, Ji G-Y,  
752 Zheng Z-D-X, et al. Regional variation limits applications of healthy gut microbiome  
753 reference ranges and disease models. *Nature Medicine* 2018; 24:1532–5.
- 754 32. Kim H-N, Joo E-J, Cheong HS, Kim Y, Kim H-L, Shin H, Chang Y, Ryu S. Gut  
755 Microbiota and Risk of Persistent Nonalcoholic Fatty Liver Diseases. *Journal of Clinical  
756 Medicine* 2019; 8:1089.
- 757 33. Castaner O, Goday A, Park Y-M, Lee S-H, Magkos F, Shiow S-ATE, Schröder H. The Gut  
758 Microbiome Profile in Obesity: A Systematic Review. *Int J Endocrinol* [Internet] 2018



- 759 [cited 2020 Apr 3]; 2018. Available from:  
760 <https://www.ncbi.nlm.nih.gov/pmc/articles/PMC5933040/>
- 761 34. Wigg AJ, Roberts-Thomson IC, Dymock RB, McCarthy PJ, Grose RH, Cummins AG. The  
762 role of small intestinal bacterial overgrowth, intestinal permeability, endotoxaemia, and  
763 tumour necrosis factor  $\alpha$  in the pathogenesis of non-alcoholic steatohepatitis. *Gut* 2001;  
764 48:206–11.
- 765 35. Mouzaki M, Comelli EM, Arendt BM, Bonengel J, Fung SK, Fischer SE, McGilvray ID,  
766 Allard JP. Intestinal microbiota in patients with nonalcoholic fatty liver disease. *Hepatology*  
767 2013; 58:120–7.
- 768 36. Shen F, Zheng R-D, Sun X-Q, Ding W-J, Wang X-Y, Fan J-G. Gut microbiota dysbiosis in  
769 patients with non-alcoholic fatty liver disease. *Hepatobiliary & Pancreatic Diseases*  
770 *International* 2017; 16:375–81.
- 771 37. Sharpton SR, Ajmera V, Loomba R. Emerging Role of the Gut Microbiome in  
772 Nonalcoholic Fatty Liver Disease: From Composition to Function. *Clinical*  
773 *Gastroenterology and Hepatology* 2019; 17:296–306.
- 774 38. Jiang W, Wu N, Wang X, Chi Y, Zhang Y, Qiu X, Hu Y, Li J, Liu Y. Dysbiosis gut  
775 microbiota associated with inflammation and impaired mucosal immune function in  
776 intestine of humans with non-alcoholic fatty liver disease. *Sci Rep* 2015; 5:8096.
- 777 39. Suzuki TA, Worobey M. Geographical variation of human gut microbial composition.  
778 *Biology Letters* 2014; 10:20131037.
- 779 40. Meslier V, Laiola M, Roager HM, Filippis FD, Roume H, Quinquis B, Giacco R, Mennella  
780 I, Ferracane R, Pons N, et al. Mediterranean diet intervention in overweight and obese  
781 subjects lowers plasma cholesterol and causes changes in the gut microbiome and  
782 metabolome independently of energy intake. *Gut* [Internet] 2020 [cited 2020 Jun 2];  
783 Available from: <https://gut.bmj.com/content/early/2020/02/18/gutjnl-2019-320438>
- 784 41. Hillmann B, Al-Ghalith GA, Shields-Cutler RR, Zhu Q, Knight R, Knights D. SHOGUN: a  
785 modular, accurate, and scalable framework for microbiome quantification. *Bioinformatics*  
786 2020; :btaa277.
- 787 42. de Faria Ghetti F, Oliveira DG, de Oliveira JM, de Castro Ferreira LEVV, Cesar DE,  
788 Moreira APB. Influence of gut microbiota on the development and progression of  
789 nonalcoholic steatohepatitis. *Eur J Nutr* 2018; 57:861–76.
- 790 43. Mohan R, Namsolleck P, Lawson PA, Osterhoff M, Collins MD, Alpert C-A, Blaut M.  
791 *Clostridium asparagiforme* sp. nov., isolated from a human faecal sample. *Systematic and*  
792 *Applied Microbiology* 2006; 29:292–9.
- 793 44. Murray WD, Khan AW, van den BERG L. *Clostridium saccharolyticum* sp. nov., a  
794 Saccharolytic Species from Sewage Sludge. *International Journal of Systematic*  
795 *Bacteriology* 1982; 32:132–5.



- 796 45. Diether NE, Willing BP. Microbial Fermentation of Dietary Protein: An Important Factor in  
797 Diet–Microbe–Host Interaction. *Microorganisms* [Internet] 2019 [cited 2020 Apr 24]; 7.  
798 Available from: <https://www.ncbi.nlm.nih.gov/pmc/articles/PMC6352118/>
- 799 46. Zhao S, Jang C, Liu J, Uehara K, Gilbert M, Izzo L, Zeng X, Trefely S, Fernandez S, Carrer  
800 A, et al. Dietary fructose feeds hepatic lipogenesis via microbiota-derived acetate. *Nature*  
801 2020; 579:586–91.
- 802 47. Dehoux P, Marvaud JC, Abouelleil A, Earl AM, Lambert T, Dauga C. Comparative  
803 genomics of *Clostridium bolteae* and *Clostridium clostridioforme* reveals species-specific  
804 genomic properties and numerous putative antibiotic resistance determinants. *BMC*  
805 *Genomics* 2016; 17:819.
- 806 48. Deschasaux M, Bouter KE, Prodan A, Levin E, Groen AK, Herrema H, Tremaroli V,  
807 Bakker GJ, Attaye I, Pinto-Sietsma S-J, et al. Depicting the composition of gut microbiota  
808 in a population with varied ethnic origins but shared geography. *Nature Medicine* 2018;  
809 24:1526–31.
- 810 49. Canfora EE, Meex RCR, Venema K, Blaak EE. Gut microbial metabolites in obesity,  
811 NAFLD and T2DM. *Nature Reviews Endocrinology* 2019; 15:261–73.
- 812 50. Cheng H-Y, Wang H-Y, Chang W-H, Lin S-C, Chu C-H, Wang T-E, Liu C-C, Shih S-C.  
813 Nonalcoholic Fatty Liver Disease: Prevalence, Influence on Age and Sex, and Relationship  
814 with Metabolic Syndrome and Insulin Resistance. *International Journal of Gerontology*  
815 2013; 7:194–8.
- 816 51. Lonardo A, Nascimbeni F, Ballestri S, Fairweather D, Win S, Than TA, Abdelmalek MF,  
817 Suzuki A. Sex Differences in Nonalcoholic Fatty Liver Disease: State of the Art and  
818 Identification of Research Gaps. *Hepatology* 2019; 70:1457–69.
- 819 52. Näyhä S. Geographical variations in cardiovascular mortality in Finland, 1961-1985. *Scand*  
820 *J Soc Med Suppl* 1989; 40:1–48.
- 821 53. Kerminen S, Havulinna AS, Hellenthal G, Martin AR, Sarin A-P, Perola M, Palotie A,  
822 Salomaa V, Daly MJ, Ripatti S, et al. Fine-Scale Genetic Structure in Finland. *G3: Genes,*  
823 *Genomes, Genetics* 2017; 7:3459–68.
- 824 54. Borodulin K, Tolonen H, Jousilahti P, Jula A, Juolevi A, Koskinen S, Kuulasmaa K,  
825 Laatikainen T, Männistö S, Peltonen M, et al. Cohort Profile: The National FINRISK  
826 Study. *International Journal of Epidemiology* 2018; 47:696–696i.
- 827 55. Borodulin K, Vartiainen E, Peltonen M, Jousilahti P, Juolevi A, Laatikainen T, Männistö S,  
828 Salomaa V, Sundvall J, Puska P. Forty-year trends in cardiovascular risk factors in Finland.  
829 *Eur J Public Health* 2015; 25:539–46.
- 830 56. Sanders JG, Nurk S, Salido RA, Minich J, Xu ZZ, Zhu Q, Martino C, Fedarko M, Arthur  
831 TD, Chen F, et al. Optimizing sequencing protocols for leaderboard metagenomics by  
832 combining long and short reads. *Genome Biology* 2019; 20:226.

- 833 57. Glenn TC, Nilsen RA, Kieran TJ, Sanders JG, Bayona-Vásquez NJ, Finger JW, Pierson  
834 TW, Bentley KE, Hoffberg SL, Louha S, et al. Adapterama I: universal stubs and primers  
835 for 384 unique dual-indexed or 147,456 combinatorially-indexed Illumina libraries (iTru &  
836 iNext). *PeerJ* 2019; 7:e7755.
- 837 58. Méric G, Wick RR, Watts SC, Holt KE, Inouye M. Correcting index databases improves  
838 metagenomic studies. *bioRxiv* 2019; :712166.
- 839 59. Parks DH, Chuvochina M, Chaumeil P-A, Rinke C, Mussig AJ, Hugenholtz P. A complete  
840 domain-to-species taxonomy for Bacteria and Archaea. *Nature Biotechnology* 2020; :1–8.
- 841 60. Kim D, Song L, Breitwieser FP, Salzberg SL. Centrifuge: rapid and sensitive classification  
842 of metagenomic sequences. *Genome Res* [Internet] 2016 [cited 2018 May 12]; Available  
843 from: <http://genome.cshlp.org/content/early/2016/11/16/gr.210641.116>
- 844 61. R Core Team. R: A language and environment for statistical computing [Internet]. Vienna,  
845 Austria: R Foundation for Statistical Computing; 2018 [cited 2019 Mar 4]. Available from:  
846 <https://www.R-project.org/>
- 847 62. McMurdie PJ, Holmes S. phyloseq: An R package for reproducible interactive analysis and  
848 graphics of microbiome census data. *PLoS ONE* 2013; 8:e61217.
- 849 63. Gloor GB, Macklaim JM, Pawlowsky-Glahn V, Egozcue JJ. Microbiome Datasets Are  
850 Compositional: And This Is Not Optional. *Front Microbiol* [Internet] 2017 [cited 2020 Jul  
851 20]; 8. Available from: <https://www.ncbi.nlm.nih.gov/pmc/articles/PMC5695134/>
- 852 64. Louca S, Polz MF, Mazel F, Albright MBN, Huber JA, O'Connor MI, Ackermann M, Hahn  
853 AS, Srivastava DS, Crowe SA, et al. Function and functional redundancy in microbial  
854 systems. *Nat Ecol Evol* 2018; 2:936–43.
- 855 65. Oksanen J, Blanchet FG, Friendly M, Kindt R, Legendre P, McGlenn D, Minchin PR,  
856 O'Hara RB, Simpson GL, Solymos P, et al. vegan: Community Ecology Package [Internet].  
857 2018 [cited 2018 Jun 4]. Available from: <https://CRAN.R-project.org/package=vegan>
- 858 66. Chen T, Guestrin C. XGBoost: A Scalable Tree Boosting System. *Proceedings of the 22nd  
859 ACM SIGKDD International Conference on Knowledge Discovery and Data Mining -  
860 KDD '16* 2016; :785–94.
- 861 67. Bommert A, Sun X, Bischl B, Rahnenführer J, Lang M. Benchmark for filter methods for  
862 feature selection in high-dimensional classification data. *Computational Statistics & Data  
863 Analysis* 2020; 143:106839.
- 864 68. Bischl B, Lang M, Kotthoff L, Schiffner J, Richter J, Studerus E, Casalicchio G, Jones ZM.  
865 mlr: Machine Learning in R. *Journal of Machine Learning Research* 2016; 17:1–5.
- 866 69. Bischl B, Richter J, Bossek J, Horn D, Thomas J, Lang M. mlrMBO: A Modular  
867 Framework for Model-Based Optimization of Expensive Black-Box Functions.

- 868 arXiv:170303373 [stat] [Internet] 2018 [cited 2020 Feb 18]; Available from:  
869 <http://arxiv.org/abs/1703.03373>
- 870 70. Greenwell BM. pdp: An R Package for Constructing Partial Dependence Plots. *The R*  
871 *Journal* 2017; 9:421–36.
- 872 71. Yu G, Smith DK, Zhu H, Guan Y, Lam TT-Y. ggtree: an r package for visualization and  
873 annotation of phylogenetic trees with their covariates and other associated data. *Methods in*  
874 *Ecology and Evolution* 2017; 8:28–36.
- 875 72. Douglas GM, Maffei VJ, Zaneveld J, Yurgel SN, Brown JR, Taylor CM, Huttenhower C,  
876 Langille MGI. PICRUSt2: An improved and extensible approach for metagenome  
877 inference. *bioRxiv* 2019; :672295.
- 878 73. Seemann T. Prokka: rapid prokaryotic genome annotation. *Bioinformatics* 2014; 30:2068–  
879 9.
- 880 74. Belcour A, Frioux C, Aite M, Bretaudeau A, Siegel A. Metage2Metabo: metabolic  
881 complementarity applied to genomes of large-scale microbiotas for the identification of  
882 keystone species. *bioRxiv* 2019; :803056.
- 883 75. Karp PD, Midford PE, Billington R, Kothari A, Krummenacker M, Latendresse M, Ong  
884 WK, Subhraveti P, Caspi R, Fulcher C, et al. Pathway Tools version 23.0 update: software  
885 for pathway/genome informatics and systems biology. *Briefings in Bioinformatics*  
886 2019; :bbz104.
- 887 76. Caspi R, Billington R, Fulcher CA, Keseler IM, Kothari A, Krummenacker M, Latendresse  
888 M, Midford PE, Ong Q, Ong WK, et al. The MetaCyc database of metabolic pathways and  
889 enzymes. *Nucleic Acids Res* 2018; 46:D633–9.
- 890

## 891 Figures

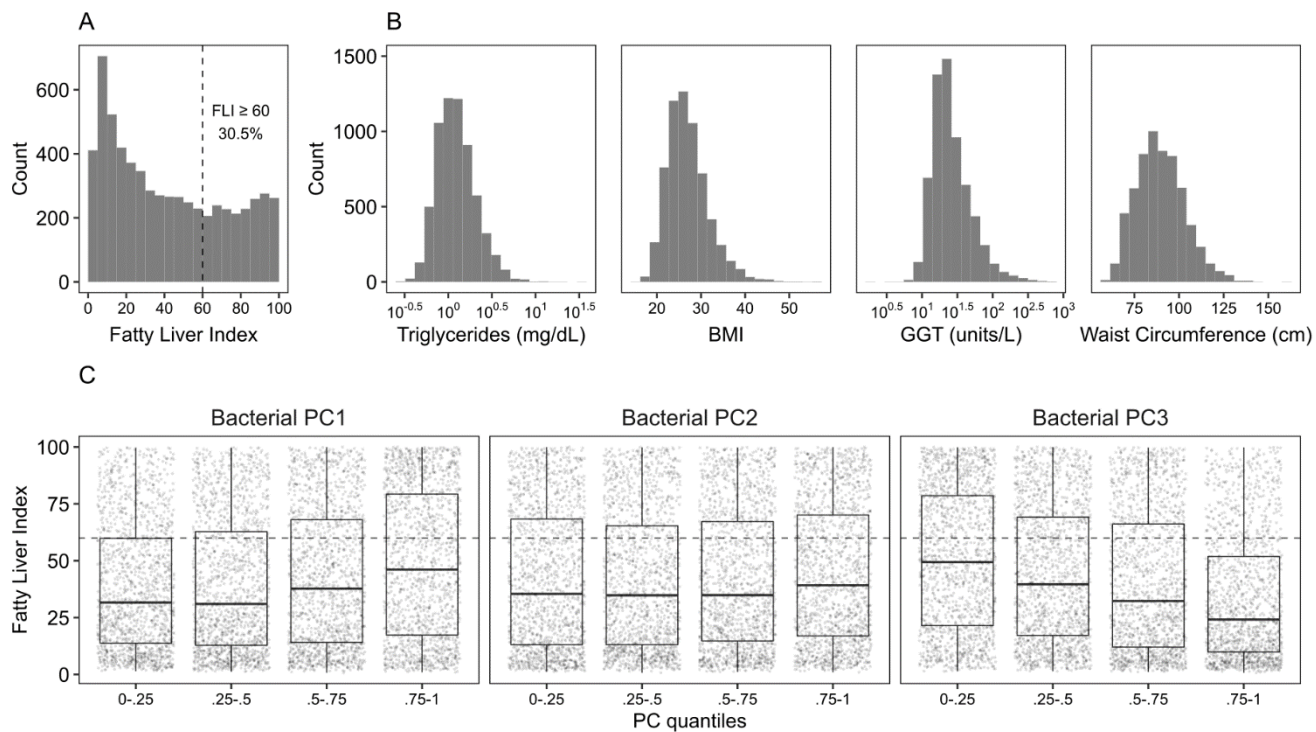

892 **Figure 1.** Distribution of FLI (A), its components (B), and FLI in quantiles of the first three PC  
893 components of the fecal bacterial composition of the participants (C). The cutoff at FLI = 60  
894 used to divide the participants is indicated with a dashed line in panels A and C.

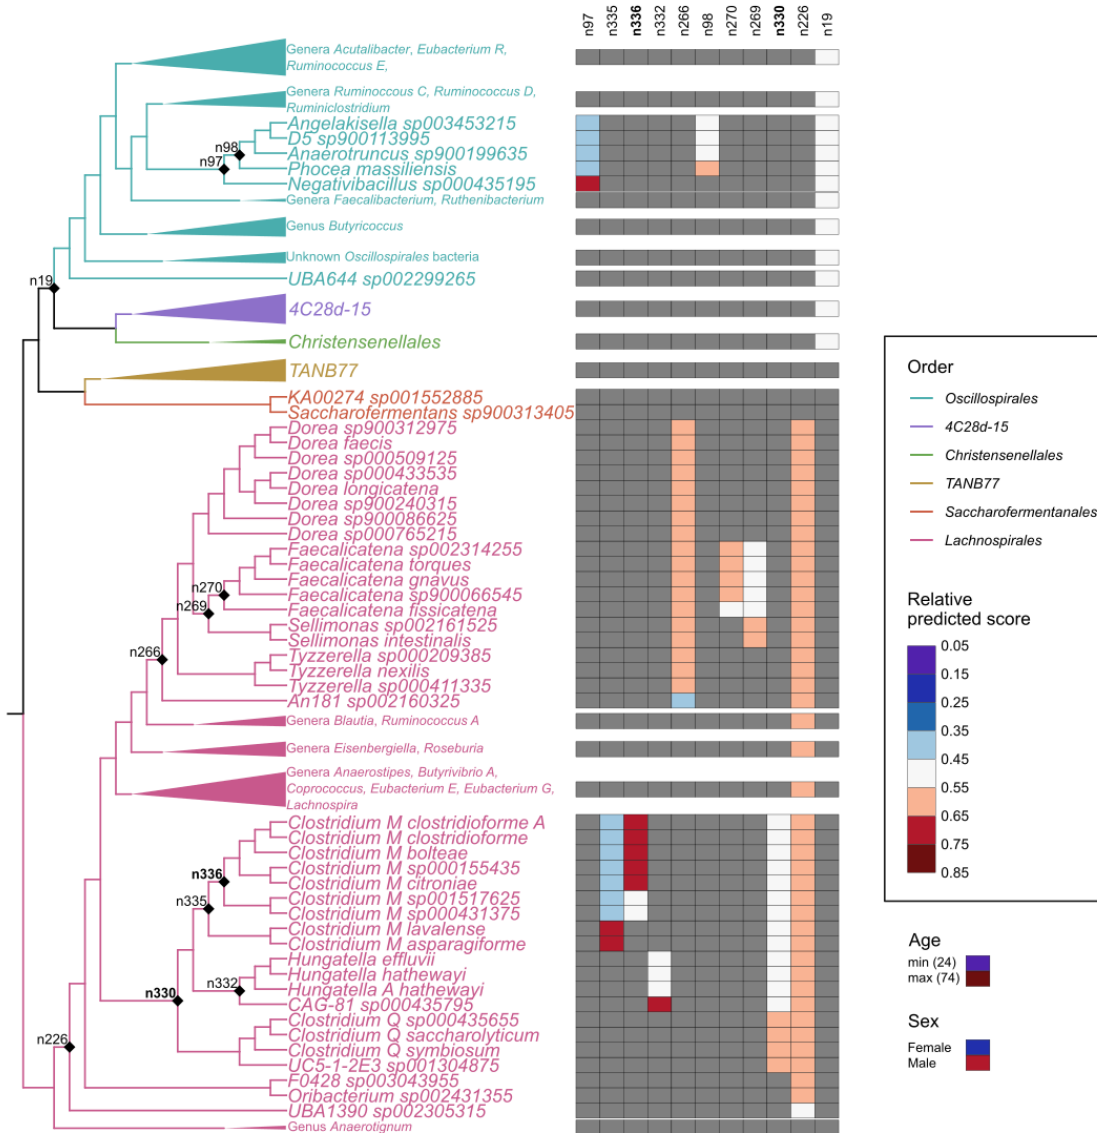

895 **Figure 2.** Relative effects of predictive balances and covariates on the FLI < 60 and FLI ≥ 60  
 896 classification model (AUC = 0.75) predictions. Nodes of the balances are indicated in the  
 897 cladogram and the relative effect sizes of their clades (opposite sides of each balance) are shown  
 898 in the associated heatmap. The relative effect sizes of the covariates (age and sex) are shown  
 899 below the legend with a heatmap on the same scale as was used for the balances. The two liver-  
 900 specific balances associated with triglyceride and GGT levels are indicated with bold font.  
 901 Clades with redundant information have been collapsed but their major genera are indicated. The  
 902 complete tree is included in **Figure S3**.
