# Links between gut microbiome composition and fatty liver disease in a large population sample

Matti O. Ruuskanen<sup>1,2\*</sup>, Fredrik Åberg<sup>3,4</sup>, Ville Männistö<sup>5,6</sup>, Aki S. Havulinna<sup>2,7</sup>, Guillaume Méric<sup>8,9</sup>, Yang Liu<sup>8,10</sup>, Rohit Loomba<sup>11,12</sup>, Yoshiki Vázquez-Baeza<sup>13,14</sup>, Anupriya Tripathi<sup>15,16,17</sup>, Liisa M. Valsta<sup>2</sup>, Michael Inouye<sup>8,18</sup>, Pekka Jousilahti<sup>2</sup>, Veikko Salomaa<sup>2</sup>, Mohit Jain<sup>12,19</sup>, Rob Knight<sup>13,14,20,21</sup>, Leo Lahti<sup>22</sup>, Teemu J. Niiranen<sup>1,2,23</sup>

<sup>1</sup>Department of Internal Medicine, University of Turku, Turku, Finland

<sup>2</sup>Department of Public Health Solutions, Finnish Institute for Health and Welfare, Helsinki, Finland

<sup>3</sup>Transplantation and Liver Surgery Clinic, Helsinki University Hospital, University of Helsinki, Helsinki, Finland

<sup>4</sup>The Transplant Institute, Sahlgrenska University Hospital, Gothenburg, Sweden

<sup>5</sup>Department of Medicine, Kuopio University Hospital, University of Eastern Finland, Kuopio, Finland

<sup>6</sup>Department of Experimental Vascular Medicine, Amsterdam UMC, University of Amsterdam, Amsterdam, The Netherlands

<sup>7</sup>Institute for Molecular Medicine Finland, FIMM - HiLIFE, Helsinki, Finland

<sup>8</sup>Cambridge Baker Systems Genomics Initiative, Baker Heart and Diabetes Institute, Melbourne, Victoria, Australia

<sup>9</sup>Department of Infectious Diseases, Central Clinical School, Monash University, Melbourne, Victoria, Australia

<sup>10</sup>Department of Clinical Pathology, The University of Melbourne, Melbourne, Victoria, Australia

<sup>11</sup>Department of Medicine, NAFLD Research Center, La Jolla, CA, USA

<sup>12</sup>Department of Medicine, University of California, San Diego, La Jolla, CA, USA

<sup>13</sup>Jacobs School of Engineering, University of California, San Diego, La Jolla, CA, USA

<sup>14</sup>Center for Microbiome Innovation, University of California San Diego, La Jolla, California, USA

<sup>15</sup>Collaborative Mass Spectrometry Innovation Center, Skaggs School of Pharmacy and Pharmaceutical Sciences, University of California, San Diego, La Jolla, California, USA

<sup>16</sup>Skaggs School of Pharmacy and Pharmaceutical Sciences, University of California, San Diego, La Jolla, California, USA

<sup>17</sup>Division of Biological Sciences, University of California, San Diego, La Jolla, California, USA

<sup>18</sup>Department of Public Health and Primary Care, Cambridge University, Cambridge, United Kingdom

<sup>19</sup>Department of Pharmacology, University of California San Diego, La Jolla, California, USA

<sup>20</sup>Department of Pediatrics, School of Medicine, University of California San Diego, La Jolla, California, USA

<sup>21</sup>Department of Computer Science & Engineering, University of California San Diego, La Jolla, California, USA

<sup>22</sup>Department of Future Technologies, University of Turku, Turku, Finland

<sup>23</sup>Division of Medicine, Turku University Hospital, Turku, Finland

\*Correspondence: Matti Ruuskanen, [matti.ruuskanen@utu.fi](mailto:matti.ruuskanen@utu.fi)

Running head: Gut microbiome composition and fatty liver

## 40 **Abstract**

41 Fatty liver disease is the most common liver disease in the world. It is characterized by a build-  
42 up of excess fat in the liver that can lead to cirrhosis and liver failure. The link between fatty  
43 liver disease and gut microbiome has been known for at least 80 years. However, this association  
44 remains mostly unstudied in the general population because of underdiagnosis and small sample  
45 sizes. To address this knowledge gap, we studied the link between the Fatty Liver Index (FLI), a  
46 well-established proxy for fatty liver disease, and gut microbiome composition in a  
47 representative, ethnically homogeneous population sample of 6,269 participants in Finland. We  
48 based our models on biometric covariates and gut microbiome compositions from shallow  
49 metagenome sequencing. Our classification models could discriminate between individuals with  
50 a high FLI ( $\geq 60$ , indicates likely liver steatosis) and low FLI ( $< 60$ ) in internal cross-region  
51 validation, consisting of 30% of the data not used in model training, with an average AUC of  
52 0.75 and AUPRC of 0.56 (baseline at 0.30). In addition to age and sex, our models included  
53 differences in 11 microbial groups from class *Clostridia*, mostly belonging to orders  
54 *Lachnospirales* and *Oscillospirales*. Our models were also predictive of the high FLI group in a  
55 different Finnish cohort, consisting of 258 participants, with an average AUC of 0.77 and  
56 AUPRC of 0.51 (baseline at 0.21). Pathway analysis of representative genomes of the positively  
57 FLI-associated taxa in (NCBI) *Clostridium* subclusters IV and XIVa indicated the presence of  
58 *e.g.*, ethanol fermentation pathways. Our results provide with replicable high-resolution  
59 associations between gut microbiota composition and fatty liver disease risk in a large  
60 representative population cohort and support the role of endogenous ethanol producers in the  
61 development of fatty liver.

62 **Keywords: Metagenomics, human gut, fatty liver, fatty liver index, population sample**

## 63 **Introduction**

64 Fatty liver disease affects roughly a quarter of the world's population.<sup>1</sup> It is characterized by  
65 accumulation of fat in the liver cells and is intimately linked with pathophysiology of metabolic  
66 syndrome.<sup>2-4</sup> Fatty liver disease can be broadly divided into two variants: non-alcoholic fatty  
67 liver disease (NAFLD), attributed to high caloric intake, and alcohol associated fatty liver  
68 disease, attributed to high alcohol consumption. Even though the rate of progressions and  
69 underlying causes of both diseases might be different, they can be broadly sub-divided into those  
70 who have fat accumulation in the liver with no or minimal inflammation or those who have  
71 additional features of cellular injury and active inflammation with or without fibrosis typically  
72 seen in peri-sinusoidal area.<sup>5</sup> Patients with steatohepatitis may progress to cirrhosis and  
73 hepatocellular carcinoma and have increased risk of liver-related morbidity and mortality,  
74 globally amounting to hundreds of thousands of deaths.<sup>6</sup>

75

76 The human gut harbors up to  $10^{12}$  microbes per gram of content,<sup>7</sup> and is intimately connected  
77 with the liver. Thus, it is no surprise that gut microbiome composition appears to have a strong  
78 connection with liver disease.<sup>8</sup> Numerous studies over the past 80 years have reported  
79 associations between gut microbial composition and liver disease.<sup>9</sup> For example, gut  
80 permeability and overgrowth of bacteria in the small intestine,<sup>10</sup> changes in  
81 *Gammaproteobacteria* and *Erysipelotrichi* abundance during choline deficiency,<sup>11</sup> elevated  
82 abundance of ethanol-producing bacteria,<sup>12,13</sup> metagenomic signatures of specific bacterial  
83 species,<sup>14,15</sup> have all been linked to NAFLD in small case-control patient samples. However, the  
84 microbial signatures often overlap between NAFLD and metabolic diseases, while those of more  
85 serious liver disease such as steatohepatitis and cirrhosis are more clear.<sup>16</sup> For example, oral taxa

86 appear to invade the gut in liver cirrhosis,<sup>17</sup> and this phenotype can accurately be detected by  
87 analyzing the fecal microbiome composition (AUC = 0.87 in a validation cohort).<sup>8</sup> Furthermore,  
88 we recently demonstrated good prediction accuracy for incident liver disease diagnoses (AUC =  
89 0.83 for non-alcoholic liver disease, AUC = 0.96 for alcoholic liver disease, during ~15 years),<sup>18</sup>  
90 showing that the signatures of serious future liver disease are easy to detect.

91

92 The mechanisms underlying the contribution of gut microbiome content with fatty liver disease  
93 are thought to be primarily linked to gut bacterial metabolism. Bacterial metabolites can indeed  
94 be translocated from the gut through the intestinal barrier into the portal vein and transported to  
95 the liver, where they interact with liver cells, and can lead to inflammation and steatosis.<sup>19</sup> Short-  
96 chain fatty acid production, conversion of choline into methylamines, modification of bile acids  
97 (BA) into secondary BA, and ethanol production, all of which are mediated by gut bacteria, are  
98 also known to be aggravating factors for NAFLD.<sup>19</sup> Recent studies have also suggested that  
99 endogenous ethanol production by gut bacteria could lead to an increase in gut membrane  
100 permeability.<sup>13</sup> This can facilitate the translocation of bacterial metabolites and cell components  
101 such as lipopolysaccharides from the gut to the liver, leading to further inflammation and  
102 possible development of NAFLD.<sup>20</sup>

103

104 Liver biopsy assessment is the current gold standard for diagnosis of fatty liver disease and its  
105 severity,<sup>21</sup> but it is also impractical and unethical in a population-based setting. Ultrasound and  
106 MRI based assessment can help detect presence of fatty liver, however, this data is not available  
107 in our cohort. Regardless, recent studies have shown that indices based on anthropometric

108 measurements and standard blood tests can be a reliable tool for non-invasive diagnosis of fatty  
109 liver particularly in population-based epidemiologic studies.<sup>22,23</sup>

110

111 Here, we designed and conducted computational analyses to examine the links between fatty  
112 liver and gut microbiome composition in a representative population sample of 7211 extensively  
113 phenotyped Finnish individuals.<sup>24</sup> Because fatty liver disease is generally underdiagnosed in the  
114 general population,<sup>25</sup> we used population-wide measurements of BMI, waist circumference,  
115 blood triglycerides and gamma-glutamyl transferase (GGT) to calculate a previously validated  
116 Fatty Liver Index (FLI) for each participant as a proxy for fatty liver.<sup>26</sup> In parallel, we used  
117 shallow shotgun sequencing to analyze gut microbiome composition,<sup>27</sup> which also enabled the  
118 use of phylogenetic and pathway prediction methods. In this work, we describe high-resolution  
119 associations between fatty liver and individual gut microbial taxa and clades, which are  
120 replicable in an external Finnish cohort and appear to be generalizable at the population level.

121

## 122 **Results**

### 123 *Bacterial community structure is correlated with Fatty Liver Index in a population* 124 *sample*

125 In addition to known covariates, all microbiome data used in our analyses was either directly or  
126 indirectly based on archaeal and bacterial phylogenetic “balances”. We used the PhILR  
127 transform, where each balance represents a single internal node in a phylogenetic tree, and its  
128 value is a log-ratio of the abundances of the two descending clades (for details, see methods and  
129 ref.<sup>28</sup>). Positive values of the balance signify that the clade in the numerator is more abundant,  
130 and negative values that the clade in the denominator is more abundant. Thus, each association

131 of a balance with the target variable necessarily includes both microbial clades descending from  
132 the node, one of them positively and the other negatively associated with the target variable. The  
133 clades in the numerator and denominator can be also freely switched by changing the sign of the  
134 balance value to retain the equivalence. Notably, we used this feature to show all balance-FLI  
135 associations in the positive direction to facilitate the comparison of their effect sizes (in **Figures**  
136 **S2, S5, and S7**).

137

138 To investigate the link between fatty liver disease (using FLI as a proxy; **Figures 1A, 1B**) and  
139 gut microbial composition (**Figure S1**), we used linear regression (adjusted  $R^2 = 0.29$ ) on the  
140 three first principal component (PC) axes of the fecal bacterial beta diversity (between  
141 individuals), sex, age, and alcohol to model FLI.  $\log_{10}(\text{FLI})$  significantly correlated with all three  
142 bacterial PC axes, sex, age, and alcohol use (all  $P < 1 \times 10^{-6}$ ). Correlations between FLI and  
143 archaeal PC axes were not significant ( $P > 0.05$ ). The effect size estimate on  $\log_{10}(\text{FLI})$  was a  
144 magnitude larger for PC1 ( $0.11 \pm 0.008$ ) than for PC2 ( $0.04 \pm 0.008$ ) and PC3 ( $-0.06 \pm 0.008$ ).  
145 The relationships between FLI and the bacterial PC components representing their beta diversity  
146 are visualized for each of the three components in **Figure 1C**. In our analyses, we classified our  
147 reads against the Genome Taxonomy Database (GTDB),<sup>29</sup> and thus the taxonomy discussed in  
148 this study follows the standardized GTDB taxonomy, unless otherwise noted.

149

150 Bacterial clades associated with higher FLI values, on the positive side of the balances  
151 contributing to PC1, included members of orders *Lachnospirales* and *Oscillospirales*, class  
152 *Bacilli*, and the *Ruminococcaceae*, *Bacteroidaceae* and *Lachnospiraceae* families (**Figure S2**).  
153 Several clades had a negative association with FLI, on the negative side of the balances

154 contributing to PC1, such as order *Christensenellales* and genus *Faecalibacterium*. In addition,  
155 genus *Bifidobacterium* in PC2, and family *Bifidobacteriaceae* in PC3 had negative associations  
156 with continuous FLI.

157

158 ***Bacterial lineages within the NCBI Clostridium subclusters IV and XIVa associate***  
159 ***with FLI***

160 In our study, the continuous FLI and differences between FLI groups in the FINRISK 2002  
161 cohort (FLI < 60,  $N = 4,359$  and FLI  $\geq 60$ ,  $N = 1,910$ ; see **Figures 1A, 1B, Table S1**) were  
162 modeled with gradient boosting regression or classification using Leave-One-Group-Out Cross-  
163 Validation (LOGOCV) between participants from different regions.

164

165 After feature selection and Bayesian hyperparameter optimization, the correlation between the  
166 predictions of the final regression models (age, sex, self-reported alcohol use, and 18 bacterial  
167 balances as features; each trained on the data from 5/6 regions) and true values in unseen data  
168 from the omitted region averaged  $R^2 = 0.30$  (0.26 – 0.33). After feature selection and  
169 optimization, the main classification models (age, sex, and 11 bacterial balances as features; each  
170 trained on the data from 5/6 regions) averaged AUC = 0.75 (**Table S2**) and AUPRC = 0.56  
171 (baseline at 0.30; **Table S3**) on (unseen) test data from the omitted region. Models trained using  
172 only the covariates averaged AUC = 0.71 (AUPRC = 0.47) and using only the 11 bacterial  
173 balances they averaged AUC = 0.66 (AUPRC = 0.47) on test data. Alternative models were  
174 constructed by excluding participants with FLI between 30 and 60 ( $N = 1,583$ ) and discerning  
175 between groups of FLI < 30 ( $N = 2,776$ ) and FLI  $\geq 60$  ( $N = 1,910$ ). These models averaged AUC  
176 = 0.80 (AUPRC = 0.75, baseline at 0.41) on their respective test data (**Tables S2, S3**). They

177 averaged AUC = 0.76 (AUPRC = 0.68) when using only the covariates, and AUC = 0.70  
178 (AUPRC = 0.63) when using only the 20 bacterial balances.  
179  
180 Because training data from all 6 regions was used to prevent overfitting in the selection of core  
181 features for all of the models, and similarly in searching for common hyperparameters,  
182 participants from the validation region of each model (in the training partition) partly influenced  
183 these parameters. Thus, we also constructed classification models discerning between the FLI <  
184 60 and FLI  $\geq$  60 groups, where data of the validation region was completely excluded in the  
185 feature selection and hyperparameter optimization of each LOGOCV model. These models,  
186 using their individual feature sets and hyperparameters, averaged AUC = 0.75 and AUPRC =  
187 0.57 (baseline at 0.30) on test data from their respective validation regions (**Table S4**). Using  
188 only covariates, they averaged AUC = 0.71 (AUPRC = 0.47), and AUC = 0.67 (AUPRC = 0.48)  
189 with only the bacterial balances.  
190  
191 Our external validation data consisted of 258 participants after exclusion of pregnant participants  
192 or those on antibiotics in the past 6 months, in the FINRISK 2007 population cohort<sup>30</sup> (**Table S1**,  
193 **Figure S3**). The participants originate from North Karelia and Helsinki/Vantaa regions in  
194 Finland, and their samples were processed with the same methodology as was used for FINRISK  
195 2002. In this external validation, the 6 full models trained with covariates and the 11 bacterial  
196 balances in FINRISK 2002 averaged AUC = 0.77 (AUPRC = 0.51, baseline at 0.21; **Table S5**).  
197 The covariate-only models averaged AUC = 0.72 (AUPRC = 0.40) and the balance-only models  
198 averaged AUC = 0.69 (AUPRC = 0.44). The receiver operating characteristic and precision-  
199 recall curves based on the averaged predictions of the models, tested on this external validation



200 data, also display good diagnostic ability (AUC = 0.78, AUPRC = 0.51 with baseline at 0.51;

201 **Figure S4)**

202

203 To facilitate interpretability of the results, we continued examining the main classification

204 models using a common set of core features. In these models, the median effect sizes of the

205 features on the model predictions at their minimum and maximum values were highest for age,

206 followed by sex, and the 11 balances in the phylogenetic tree (**Figures S5, S6**). All 11 associated

207 balances were in phylum *Firmicutes*, class *Clostridia*, and largely in the NCBI *Clostridium*

208 subclusters IV and XIVa (**Figure 2**). The specific taxa represented standardized GTDB genera

209 (NCBI in brackets) *Negativibacillus* (*Clostridium*), *Clostridium M* (*Lachnoclostridium* /

210 *Clostridium*), *CAG-81* (*Clostridium*), *Dorea* (*Merdimonas* / *Mordavella* / *Dorea* / *Clostridium* /

211 *Eubacterium*), *Faecalicatena* (*Blautia* / *Ruminococcus* / *Clostridium*), *Blautia* (*Blautia*),

212 *Sellimonas* (*Sellimonas* / *Drancourtella*), *Clostridium Q* (*Lachnoclostridium* [*Clostridium*]) and

213 *Tyzzarella* (*Tyzzarella* / *Coprococcus*). Notably, all but one of the features in the main

214 classification models (n226) were identified in the feature selection for the alternative models

215 (constructed otherwise identically, but  $FLI < 30$  was compared against  $FLI \geq 60$  in different data

216 partitions), together with 10 additional balances (**Figure S7**). Only one of the balances in the

217 alternative models was outside phylum *Firmicutes* (n1712 in *Bacteroidota*), and in addition, 4

218 balances were outside class *Clostridia* (n481 in *Negativicutes*; n826, n1009 and n918 in *Bacilli*).

219 Also, negative associations with the high FLI group were seen for *An181 sp002160325* in the

220 balance n266, where it is compared against the clade including *Dorea*, *Faecalicatena*,

221 *Sellimonas* and *Tyzzarella* species (**Figures 2, S6**). A higher abundance of the clade including

222 *Angelakisella*, *D5*, *Anaerotruncus* and *Phocea* species (against *Negativibacillus sp00435195* in  
223 balance n97) was also negatively associated with high FLI.

224

225 In addition to blood test results, FLI is based on two anthropometric markers linked to metabolic  
226 syndrome, waist circumference and BMI. This prompted us to dissect the Fatty Liver Index and  
227 identify which of the covariates and associated microbial balances from the phylogenetic tree can  
228 be linked to blood GGT and triglycerides measurements (see **Figure 1B**), and therefore would be  
229 most specific to hepatic steatosis and liver damage.<sup>31</sup> To do so, we performed feature selection  
230 (similarly to continuous FLI) for GGT and triglycerides measurements in subsets of participants  
231 grouped by age, sex, and BMI. The feature selection identified two balances within the NCBI  
232 *Clostridia* XIVa subcluster (identified as n336 and n330) which were important for both GGT  
233 and triglyceride level prediction, and thus likely specific to liver function (**Figure 2**). Bacterial  
234 taxa were positively linked to liver function in these balances, and included (NCBI species)  
235 *Clostridium clostridioforme*, *C. bolteae*, *C. citroniae*, *C. saccharolyticum* and *C. symbiosum*. On  
236 the opposite, negatively associated side of the balances were, among others, (NCBI species)  
237 *Hungatella effluvii*, *H. hathewayi*, and two new GTDB-defined species *Clostridium M*  
238 *sp001517625* and *C. M sp000431375*.

239

240 ***Ethanol and acetate production pathways are identified in representative bacterial***  
241 ***genomes from taxa linked to high FLI***

242 The values of predictive balances in the phylogenetic tree cannot be summarized for individual  
243 taxa, which means that only a qualitative investigation of the associations between their  
244 metabolism and fatty liver was possible in this study. We identified genetic pathways predicted

245 to encode for SCFA (acetate, propanoate, butanoate) and ethanol production, BA metabolism,  
246 and choline degradation to trimethylamine (TMA) in representative genomes from the taxa we  
247 identified to be linked to liver function (**Figure S6**). These specific processes were chosen  
248 because they have been previously identified to have a mechanistic link to NAFLD (see *e.g.*, ref.  
249 <sup>19</sup>).

250

251 Acetate and ethanol production pathways appeared to be more abundant in the representative  
252 genomes of the taxa which had a positive association with FLI. In the liver function specific  
253 clades, n336 and n330, MetaCyc pathways for pyruvate fermentation to ethanol III (PWY-6587)  
254 and L-glutamate degradation V (via hydroxyglutarate; P162-PWY; produces acetate and  
255 butanoate) were present only in genomes positively associated with FLI. In balance n336, also  
256 heterolactic fermentation (P122-PWY; produces ethanol and lactate) was more often encoded in  
257 the clade positively associated with the high FLI group (3/5) than the opposing negatively  
258 associated clade (1/2). In representative genomes from the liver-specific balance n336, potential  
259 ethanol producers (PWY-6587) were seen in the positively associated clade (*Clostridium M*  
260 *clostridoforme A* and *Clostridium M sp000155435*), and not in the negatively associated clade  
261 (*Clostridium M sp001517625* and *Clostridium M sp000431375*). However, for most balances  
262 such trends were not clear in the qualitative analysis. Furthermore, we did not detect any of these  
263 pathways in the representative genomes of two individual taxa positively associated with FLI,  
264 *Negativibacillus sp000435195* and *Phoceia massiliensis* (**Figure S6**).

265

## 266 **Discussion**

267 The pathophysiology of fatty liver disease in general, and NAFLD in particular, is complex and  
268 its clinical diagnosis can be difficult.<sup>32</sup> In this study, we utilized metagenomic data from a large  
269 population cohort (FINRISK 2002<sup>30</sup>) to identify broad links between the overall gut  
270 microbiome composition and fatty liver disease, using FLI as a recognized proxy (**Figure 1C**),  
271 and identified specific microbial taxa and lineages positively and negatively associated with the  
272 high FLI group (**Figure 2**). The focus of the current study was on uncovering the strongest  
273 connections between microbiome composition and high risk of fatty liver disease at the  
274 population level. We acknowledge that because of the complexity of our analyses, these  
275 methods are not yet suited for widespread clinical application. However, our study lays the  
276 groundwork for future mechanistic studies, and eventually, the use of this information in  
277 disease prevention, diagnosis, and treatment.

278

279 Considering that the predictive ability of FLI for clinically diagnosed NAFLD ranges between  
280  $AUC = 0.81 - 0.93$ , in populations of Caucasian ethnicity such as the cohorts investigated in  
281 the current study,<sup>23</sup> our models were able to reasonably predict the FLI group with  $AUC = 0.75$   
282 ( $AUPRC = 0.56$ , baseline at 0.30), in our internal cross-region validation. Furthermore, the  
283 performance of our models was highly similar in an external validation cohort ( $AUC = 0.77$ ,  
284  $AUPRC = 0.51$ , baseline at 0.21).

285

286 Our additional analyses support these main results. Excluding participants with intermediate  
287 FLI (between 30 – 60) increased the accuracy slightly in the internal cross-validation (to  $AUC$   
288  $= 0.8$  and  $AUPRC = 0.75$ , baseline at 0.41). However, discerning between participants with

289 probable fatty liver disease ( $FLI \geq 60$ ) from others presents a clinically more relevant target for  
290 detecting changes in microbiome composition associated with development of the disease. In  
291 another set of models, we negated the influence of validation region data in the individual  
292 models also for feature selection and hyperparameter optimization during training. This led to  
293 individualized sets of features and parameters in the models, but the average performance of  
294 the models was almost identical on validation region samples in the internal cross-validation  
295 (AUC = 0.75 and AUPRC 0.57, baseline at 0.30). The aim of our study was to find patterns in  
296 microbiome composition which would be generalizable across the 6 sampled geographic  
297 regions in Finland and easy to interpret. Thus, we consider the use of all training data to define  
298 the common core feature set justified. This goal also guided our overall modeling architecture  
299 and likely led to a lower performance than if we instead performed interpolation within a  
300 smaller scale (see *e.g.*, ref. <sup>33</sup>).

301

302 When interpreting results, several different levels of associations can be considered according  
303 to types of fatty liver disease and the gut microbiome composition. Because FLI has been  
304 mostly validated with simple steatosis and NAFLD,<sup>23,26</sup> we can conservatively contextualize  
305 our findings with previous associative work that used these diagnoses or clinical  
306 manifestations, only. The cutoff used in our study at  $FLI \geq 60$  has been used to rule in liver  
307 steatosis in a Caucasian cohort comparable to ours,<sup>26</sup> but also a cutoff at  $FLI \geq 48$  has been  
308 found appropriate for simple steatosis in a Portuguese cohort.<sup>34</sup> Much lower cutoffs ( $FLI \geq 20$   
309 to 30) have been used in Asian cohorts.<sup>35-37</sup> Thus, it is likely that our high FLI groups include  
310 most participants with liver steatosis or fibrosis in both FINRISK cohorts, but the low FLI  
311 group also likely includes participants with low grade steatosis.

312

313 ***FLI modeling reveals consistent associations between gram-positive Clostridia and***  
314 ***fatty liver disease***

315 We found significant linear correlations between the first three bacterial PC-axes of our  
316 samples (a measure of beta diversity) and FLI (see results and **Figure 1C**). Previous studies  
317 have shown differences in beta diversity in relation to NAFLD.<sup>38</sup> However, FLI used in our  
318 study as a proxy for liver disease also includes features such as BMI and waist circumference,  
319 which associate with metabolic syndrome and diabetes.<sup>16</sup> Links between these diseases and gut  
320 microbiome composition are well documented in previous studies.<sup>39</sup> Several studies have  
321 reported highly specific changes in microbial abundances in relation to NAFLD.<sup>12,40–42</sup> In  
322 summary, while also conflicting results have been reported, generally increases in  
323 *Lactobacillus* and *Escherichia* genera, and a decrease in *Coprococcus* genus have been  
324 associated with a NAFLD diagnosis.<sup>43</sup> Furthermore, increased abundance of several gram-  
325 positive bacteria belonging to the *Clostridium* genus have been positively linked with  
326 NAFLD.<sup>14,44</sup> Differences in unconstrained between-samples (beta) diversity have been also  
327 documented for persistent NAFLD,<sup>38</sup> and along the NAFLD-cirrhosis spectrum.<sup>8</sup>

328

329 Through the loadings of the phylogenetic balances on the PC axes, we observed several  
330 previously known connections between microbial clades and FLI. Among others, we observed  
331 a positive association between high FLI and family *Lachnospiraceae* and negative associations  
332 for order *Christensenellales*, genus *Faecalibacterium*, and genus *Bifidobacterium*. The positive  
333 association is supported by previous findings of their connection with obesity<sup>45</sup>, and the  
334 negative associations by connections to lean individuals and healthy gut microbiome

335 composition.<sup>46-48</sup> However, these associations discovered from linear modeling of FLI based on  
336 microbial beta diversity were coarse-grained, and prompted us to construct the cross-validated  
337 machine learning models based directly on the phylogenetic balances to increase their  
338 resolution.

339

340 In these machine learning models, abundances of bacteria from the *Coprococcus* genus were  
341 not specifically associated with FLI, although the genus was nested inside our predictive  
342 balances. Strikingly, the strongest associations with FLI in our machine learning models were  
343 inside the *Firmicutes* phylum. A possible reason for this might be the higher relative abundance  
344 of phylum *Firmicutes* at high latitudes, where Finland is.<sup>49</sup> Among the associations we  
345 identified, *Faecalicatena gnavus* (NCBI: *Ruminococcus gnavus*) was positively linked with  
346 FLI as part of 3 predictive balances, and associated in previous studies with liver cirrhosis.<sup>17</sup>  
347 Interestingly, none of the oral *Firmicutes*, such as *Veillonella*, suggested to invade the gut, were  
348 identified in our own analyses. This might be caused by using only the broadly defined high  
349 FLI as a proxy, which does not directly target advanced liver disease, such as cirrhosis.

350

351 Two individual taxa, *Negativibacillus sp000435195* and *Phoceia massiliensis*, both had strong  
352 positive associations with the high FLI group (**Figures 2, S6**), but the balances including these  
353 species were not predictive of the liver function-specific components (triglycerides and GGT).  
354 Positive associations of these taxa with fatty liver disease have not been documented  
355 previously. However, a decreasing abundance of both bacteria, *Negativibacillus sp000435195*  
356 (NCBI: *Clostridium* sp. CAG:169) and *Phoceia massiliensis* (NCBI: *Phoceia massiliensis*), were  
357 seen when the intake of meat and refined cereal was reduced isocalorically in favor of fruit,

358 vegetables, wholegrain cereal, legumes, fish and nuts in overweight and obese subjects in  
359 Italy.<sup>50</sup> While comparisons between these studies are difficult due to differences in taxa  
360 annotations, bacteria such as *Faecalicatena gnavus* (NCBI: *Ruminococcus gnavus*) and  
361 *Clostridium Q saccharolyticum* (NCBI: *Clostridium saccharolyticum*) were also found to  
362 respond negatively to the Mediterranean diet. Together with their positive associations with  
363 FLI in our study, these observations would warrant further study on these species as plausible  
364 biomarkers for healthy diet choices.

365

366 Among the taxa negatively associated with high FLI, *Hungatella* (see balance n332, **Figures 1,**  
367 **S6**) have been previously shown to correlate negatively with the obesity phenotype in mice<sup>51</sup>  
368 and *H. hathewayi* was found to be a common commensal in the gut of healthy volunteers.<sup>52</sup>  
369 However, genus *Hungatella* has also been positively associated with concentrations of  
370 trimethylamine-N-oxide (TMAO),<sup>53</sup> a metabolite associated with cardiovascular disease and  
371 NAFLD. In our study, on the positively associated side (of balance n332) opposite to genus  
372 *Hungatella* was a novel GTDB species, *CAG-81 sp000435795*, previously included in NCBI  
373 genus *Clostridium*. The *CAG-81* genus was recently positively associated with TMAO levels in  
374 urine in a study using the GTDB classification.<sup>54</sup> While we did not find the pathway for TMA  
375 (precursor to TMAO) production in its genome, this would explain the positive association of  
376 the *CAG-81* species with high FLI. Furthermore, the previous contradictory results among these  
377 taxa could be explained by grouping of putatively TMA producing taxa in *CAG-81* together  
378 with the closely related genus *Hungatella*.

379



380 Most taxa in our study with a positive association with FLI belonged to the broadly defined  
381 *Clostridium* NCBI genus, which supports several previous observations.<sup>14,44</sup> However,  
382 taxonomic standardization according to GTDB has identified the *Clostridium* genus as the most  
383 phylogenetically inconsistent of all bacterial genera in the NCBI taxonomy, and divides it into  
384 a total of 121 monophyletic genera in 29 distinct families.<sup>29</sup> The GTDB reassignment  
385 complicates comparisons to previous studies, but it is phylogenetically and biologically  
386 sensible, and can thus provide new insights into the microbiomes. Our results also strongly  
387 suggest that despite its higher cost compared to metabarcoding, the increased resolution of  
388 (shallow) shotgun metagenomic sequencing is highly useful in identifying specific taxon-  
389 disease associations (see *e.g.*, refs. <sup>27,55</sup>).

390

391 ***Bacterial taxa positively associated with high FLI have a genetic potential to***  
392 ***exacerbate the development of fatty liver disease***

393 We identified several plausible new associations between individual taxa and clades of bacteria  
394 and fatty liver. All taxa were from class *Clostridia*, which are obligate anaerobes. We observed  
395 that reference genomes from the bacterial taxa positively associated with high FLI in the liver-  
396 specific balances harbored several genetic pathways necessary for ethanol production.  
397 Specifically, genes predicted to enable the fermentation of pyruvate to ethanol (MetaCyc PWY-  
398 6587) appeared to be common. Endogenous production of ethanol has been known to both  
399 induce hepatic steatosis and increase intestinal permeability,<sup>56</sup> and several of the taxa  
400 associated with the high FLI group have also been experimentally shown to produce ethanol,  
401 such as *C. M asparagiforme*, *C. M bolteae*, *C. M clostridioforme* / *C. M clostridioforme A* <sup>57</sup>,  
402 and *C. Q Saccharolyticum*.<sup>58</sup> The relative abundances of these putatively ethanol-producing

403 taxa were also predictive of FLI groups in previously unseen data. However, the self-reported  
404 alcohol consumption from the participants was not among the best predictors for the FLI  
405 groups, as it was excluded in the feature selection step.

406

407 All reference genomes from taxa positively associated with FLI in balance n330 harbored  
408 genes predicted to encode for the L-glutamate fermentation V (P162-PWY; **Figure S5**)  
409 pathway, which results in the production of acetate and butanoate. Glutamate fermentation  
410 could lead to increased microbial protein fermentation in the gut, which has been previously  
411 been linked with obesity, diabetes and NAFLD.<sup>59</sup> Recently, the combined intake of fructose  
412 and microbial acetate production in the gut was experimentally observed to contribute to  
413 lipogenesis in the liver in a mouse model.<sup>60</sup> Interestingly, *C. Q saccharolyticum* (in our study, a  
414 taxa positively associated with high FLI deriving from balance n330), was experimentally  
415 shown to ferment various carbohydrates, including fructose, to acetate, hydrogen, carbon  
416 dioxide, and ethanol.<sup>58</sup> Furthermore, while our own pathway analysis did not detect BA  
417 modification pathways in the reference genome of *C. Q saccharolyticum*, a strain of this  
418 species has been highlighted as a probable contributor to NAFLD development through the  
419 synthesis of secondary BA.<sup>15</sup> The links between dietary intake and gene regulation, combined  
420 with microbial fermentation in the gut warrant further mechanistic experiments to elucidate  
421 their links with fatty liver, and likely other metabolic diseases.

422

423 NAFLD-associated ethanol producing bacteria in previous cohort studies have all been gram-  
424 negatives, such as (NCBI-defined) *Klebsiella pneumoniae*,<sup>13</sup> and *Escherichia coli*.<sup>12</sup> In our  
425 population sample, instead of gram-negatives, bacteria from the *C. M bolteae*, *C. M*

426 *clostridioforme* / *C. M clostridioforme A* and *C. M citroniae* species (positively associated with  
427 high FLI in balance n336) have been described as opportunistic pathogens,<sup>61</sup> and are  
428 hypothesized to exacerbate fatty liver development similarly through endogenous ethanol  
429 production. This result suggests that geographical,<sup>33</sup> and ethnic variability,<sup>62</sup> might also  
430 strongly affect gut microbiome composition and its associations with disease. In addition to  
431 putative endogenous ethanol producers, we identified other taxa positively associated with high  
432 FLI in balance n330, for which reference genomes harbored a genetic pathway predicted to  
433 encode for the ability to ferment L-lysine to acetate and butyrate. While the production of these  
434 SCFAs is often considered beneficial for gut health, other metabolism of proteolytic bacteria  
435 might negatively contribute to fatty liver disease.<sup>63</sup>

436

437 Through modeling a previously validated index for fatty liver, FLI, we found replicable  
438 associations with specific microbial taxa and high risk of liver disease. In addition, sex and age  
439 of participants were also strongly predictive of the FLI group in our models (**Figures 2, S5**).  
440 Their similar positive associations with fatty liver disease are known from previous studies.<sup>64,65</sup>  
441 The associated microbial balances could be used to improve the predictions above the baseline  
442 of these covariates on 5/6 regions in Finland in the main cohort. For example, in the model  
443 cross-validated with Lapland the balances were more predictive of FLI group than the  
444 covariates by themselves, and their combination increased the AUC further. Yet, when testing  
445 the model where Turku/Loimaa region was used for internal cross-validation, the microbial  
446 balances were slightly predictive of FLI group but failed to improve the AUC over the  
447 covariates (**Table S2**). This pattern might stem from the cultural and genetic west-east division  
448 in Finland,<sup>66,67</sup> with a closer proximity of the Helsinki/Vantaa region to eastern regions than

449 Turku/Loimaa, in both terms. It is thus likely that further incorporation and investigation on the  
450 use of spatial information in microbiome modeling would elucidate these geographical patterns  
451 in taxa-disease associations.

452

453 Our models were also able to accurately predict the FLI group of participants in the external  
454 validation cohort, which were from the North Karelia and Helsinki/Vantaa regions.

455 Unfortunately, generalization of our results outside of Finland remains to be addressed in future  
456 studies. The observed difficulty to geographically extrapolate taxa-disease associations<sup>33</sup> might  
457 mean that associations reported in our study are specific to Finland and nearby regions.

458 Notably, many of the positive associations between specific taxa and fatty liver disease have  
459 not been reported previously, but the functional potential of these taxa inferred from genomic  
460 data is similar to taxa positively associated with NAFLD in previous studies. Thus, the  
461 geographical limits of taxa-disease associations reported in studies such as ours warrant further  
462 study.

463

464 It is likely that not all associations in the current study are related solely to liver steatosis,  
465 because FLI is based on measurements related to metabolic syndrome. However, our approach  
466 is supported by recent views of NAFLD as the integral liver component of the metabolic  
467 syndrome.<sup>68,69</sup> Indeed, the prevalences of diabetes and cardiovascular disease in both FINRISK  
468 2002 and 2007 cohorts are elevated in the high FLI group, although the majority of the high  
469 FLI participants did not have either of these diagnoses at the time of sampling (**Table S1**). We  
470 also dissected the FLI by dividing participants into age/sex/BMI groups and detected microbial  
471 groups specific to the blood work measurements of liver damage, triglycerides and GGT. These

472 associated taxa can thus be thought of as most closely associated with liver function, if such a  
473 division is deemed practical.

474

#### 475 ***Conclusions***

476 Modeling an established risk index for fatty liver enabled the detection of associations between  
477 the disease and gut microbiome composition, even to the level of individual taxa. The  
478 associated clades were all from the obligately anaerobic gram-positive class *Clostridia*,  
479 representing several redefined GTDB genera previously included in the polyphyletic NCBI  
480 genus *Clostridium*. Many of the representative genomes of taxa positively associated with high  
481 FLI had genomic potential for endogenous ethanol production. This suggests a possible  
482 mechanistic link to the pathophysiology of fatty liver disease through increased gut  
483 permeability and induction of hepatic steatosis. Further mechanistic links with microbial  
484 production of TMA and SCFAs, especially acetate, and fatty liver development are also likely.  
485 Our models were able to predict the FLI group of participants in Finland across geographical  
486 regions and in an external cohort, showing that the associations are robust and generalizable in  
487 the sampled population. Our hypothesized mechanistic links and geographical limits of taxa-  
488 disease associations should be addressed in future studies to increase our understanding of the  
489 pathophysiology of fatty liver disease, and for developing clinical applications aimed at its  
490 prevention, diagnosis, and treatment.

491

## 492 **Materials and Methods**

### 493 *Survey details and sample collection*

494 Cardiovascular disease risk factors have been monitored in Finland since 1972 by conducting a  
495 representative population survey every five years.<sup>30</sup> In the FINRISK 2002 survey, a stratified  
496 random population sample was conducted on six geographical regions in Finland. These are  
497 North Karelia and Northern Savo in eastern Finland, Turku and Loimaa regions in southwestern  
498 Finland, the cities of Helsinki and Vantaa in the capital region, the provinces of Northern  
499 Ostrobothnia and Kainuu in northwestern Finland, and the province of Lapland in northern  
500 Finland.

501

502 Briefly, at baseline examination the participants filled out a questionnaire form, and trained  
503 nurses carried out a physical examination and blood sampling in local health centers or other  
504 survey sites. Data was collected for physiological measures, biomarkers, and dietary,  
505 demographic and lifestyle factors. Stool samples were collected by giving willing participants a  
506 stool sampling kit with detailed instructions. These samples were mailed overnight between  
507 Monday and Thursday under Finnish winter conditions to the laboratory of the Finnish Institute  
508 for Health and Welfare, where they were stored at -20°C. In 2017, the samples were shipped still  
509 unthawed to University of California San Diego for microbiome sequencing.

510

511 Details of the FINRISK cohorts analyzed in this study are included in the supplementary files  
512 (**Table S1**). Further details and sampling have also been extensively covered in previous  
513 publications (see refs. <sup>24,70</sup>). The Coordinating Ethics Committee of the Helsinki University

514 Hospital District approved the study protocol for FINRISK 2002 (Ref. 558/E3/2001), and all  
515 participants have given their written informed consent.

516

### 517 ***Stool DNA extraction and shallow shotgun metagenome sequencing***

518 DNA extraction was performed according to the Earth Microbiome Project protocols, with the  
519 MagAttract PowerSoil DNA kit (Qiagen), as previously described.<sup>71</sup> A miniaturized version of  
520 the Kapa HyperPlus Illumina-compatible library prep kit (Kapa Biosystems) was used for library  
521 generation, following the previously published protocol.<sup>72</sup> DNA extracts were normalized to 5 ng  
522 total input per sample in an Echo 550 acoustic liquid handling robot (Labcyte Inc.). A Mosquito  
523 HV liquid-handling robot (TTP Labtech Inc.) was used for 1/10 scale enzymatic fragmentation,  
524 end-repair, and adapter-ligation reactions. Sequencing adapters were based on the iTru  
525 protocol,<sup>73</sup> in which short universal adapter stubs are ligated first and then sample-specific  
526 barcoded sequences added in a subsequent PCR step. Amplified and barcoded libraries were then  
527 quantified by the PicoGreen assay and pooled in approximately equimolar ratios before being  
528 sequenced on an Illumina HiSeq 4000 instrument to an average read count of approximately  
529 900,000 reads per sample.

530

### 531 ***Taxonomic matching and phylogenetic transforms***

532 We quality trimmed the sequences and removed the sequencing adapters with Atropos.<sup>74</sup> Host  
533 reads were removed by mapping the reads against the human genome assembly GRCh38 with  
534 Bowtie2.<sup>75</sup> To improve the taxonomic assignments of our reads, we used a custom index,<sup>76</sup> based  
535 on the Genome Taxonomy Database (GTDB) release 89 taxonomic redefinitions,<sup>29,77</sup> for read  
536 classification with default parameters in Centrifuge 1.0.4.<sup>78</sup> Viral and eukaryotic sequences were

537 removed in this step, as the database contains only bacterial and archaeal reference genomes.  
538 After read classification, all following steps were performed with R version 3.5.2.<sup>79</sup> To reduce  
539 the number of spurious read assignments, and to facilitate more accurate phylogenetic  
540 transformations, only reads classified at the species level, matching individual GTDB reference  
541 genomes, were retained. Samples with less than 50,000 reads, from pregnant participants or  
542 recorded antibiotic use in the past 6 months were removed, resulting in a final number of 6,269  
543 samples. We first filtered taxa not seen with more than 3 counts in at least 1% of samples and  
544 those with a coefficient of variation  $\leq 3$  across all samples, following McMurdie and Holmes<sup>80</sup>,  
545 with a slight adaption from 20% of samples to 1% of samples, because of our larger sample size.  
546 The complete bacterial and archaeal phylogenetic trees of the GTDB release 89 reference  
547 genomes, constructed from an alignment of 120 bacterial or 122 archaeal marker genes,<sup>29</sup> were  
548 then combined with our taxa tables. The resulting trees were thus subset only to species which  
549 were observed in at least one sample in our data. The read counts were transformed to  
550 phylogenetic node balances in both trees with PhILR.<sup>28</sup> The default method for PhILR inputs a  
551 pseudocount of 1 for taxa absent in an individual sample before the transform.  
552  
553 In this study, we did not specifically and solely use relative abundances at various taxonomic  
554 levels, as is common practice for microbiome studies. Instead, we applied a PhILR  
555 transformation to our microbial composition data,<sup>28</sup> introducing the concept of microbial  
556 “balances”. Indeed, evolutionary relationships of all species harbored in each microbiome  
557 sample can be represented on a phylogenetic tree, with species typically shown as external nodes  
558 that are related to each other by multiple branches connected by internal nodes. In this context,  
559 the value of a given microbial “balance” is defined as the log-ratio of the geometric mean



560 abundance between two groups of microbes descending from the same corresponding internal  
561 node on a microbial phylogenetic tree. This phylogenetic transform was used because it i)  
562 addresses the compositionality of the metagenomic read data,<sup>81</sup> ii) permits simultaneous  
563 comparison of all clades without merging the taxa by predefined taxonomic levels, and iii)  
564 enables evolutionary insights into the microbial community. The links between microbes and  
565 their environment, such as the human gut, is mediated by their functions. Different functions are  
566 known to be conserved at different taxonomic resolutions, and most often at multiple different  
567 resolutions.<sup>82</sup> Thus, associations between the microbes and the response variable are likely not  
568 best explained by predefined taxonomic levels. In the absence of functional data, concurrently  
569 analyzing all clades (partitioned by the nodes in the phylogenetic tree) would likely enable the  
570 detection of the associations at the appropriate resolution depending on the function and the local  
571 tree topography.

572

### 573 ***Covariates***

574 Because fatty liver disease is underdiagnosed at the population level,<sup>25</sup> and our sampling did not  
575 have extensive coverage of liver fat measurements, we chose to use the Fatty Liver index as a  
576 proxy for fatty liver.<sup>26</sup> Furthermore, the index performs well in cohorts of Caucasian ethnicity,  
577 such as ours, to diagnose the presence of NAFLD.<sup>23</sup> We calculated FLI after Bedogni et al.<sup>26</sup>:

578  $(e^{0.953 \cdot \log_e(\text{triglycerides mg/dL}) + 0.139 \cdot \text{BMI} + 0.718 \cdot \log_e(\text{GGT}) + 0.053 \cdot \text{waist circumference} - 15.745}) /$

579  $(1 + e^{0.953 \cdot \log_e(\text{triglycerides mg/dL}) + 0.139 \cdot \text{BMI} + 0.718 \cdot \log_e(\text{GGT}) + 0.053 \cdot \text{waist circumference} - 15.745}) * 100$ . We chose

580 the cutoff at  $\text{FLI} \geq 60$  to identify participants likely to be diagnosed with hepatic steatosis

581 (positive likelihood ratio = 4.3 and negative likelihood ratio = 0.5, after Bedogni et al.<sup>26</sup>).

582 Triglycerides, gamma-glutamyl transferase (GGT), BMI and waist circumference measurements

583 had near complete coverage for the participants in our data. Self-reported alcohol use was  
584 calculated as grams of pure ethanol per week. Cases with missing values were omitted in linear  
585 regression models. At least one feature used for FLI calculation was missing for 20 participants  
586 (0.3%) and the self-reported alcohol use was missing for 247 participants (3.9%). In the machine  
587 learning framework, missing values for FLI and self-reported alcohol use were mean imputed.  
588 However, for the feature selection to identify liver function-specific balances, GGT, triglycerides  
589 and BMI were not imputed but observations where any of these were missing were simply  
590 removed.

591

### 592 ***Beta diversity and linear modeling of FLI***

593 Beta diversity was calculated as Euclidian distance of the PhILR balances through Principal  
594 Component Analysis (PCA) on bacterial and archaeal balances separately with “rda” in vegan  
595 2.5.6.<sup>83</sup> A linear regression model was constructed for FLI with “lm” in base R,<sup>79</sup> with log<sub>10</sub>-  
596 transformed FLI as the dependent variable and with first three bacterial PCs, sex, age, and self-  
597 reported alcohol use as the independent variables. Archaeal PCs were dropped from the model  
598 because none of them were significantly correlated with FLI (all  $P > 0.05$ ). Variation of the  
599 samples on the top two bacterial PC axes by their effect sizes in the model were plotted together  
600 with a unit vector of log<sub>10</sub>(FLI) to show their correlation.

601

### 602 ***FLI modeling within a machine learning framework***

603 In the machine learning framework, both regression and categorical models were constructed for  
604 FLI. The feature selection, hyperparameter optimization and internal cross-validation methods  
605 were identical for both approaches, unless otherwise stated. The continuous or categorical FLI

606 (groups of  $FLI < 60$  and  $FLI \geq 60$ ) were modeled with xgboost 0.90.0.2,<sup>84</sup> by using both bacterial  
607 and archaeal balances, sex, age, and self-reported alcohol use as preliminary predictor features.  
608 We used  $FLI \geq 60$  as the cutoff for ruling in fatty liver (steatosis) for the classification, after  
609 Bedogni et al., (2006).<sup>26</sup> The data was first split to 70% train and 30% test sets while preserving  
610 sex and region balance. To take into account geographical differences (see *e.g.*, ref.<sup>33</sup>) and to  
611 find robust patterns across all 6 sampled regions in Finland between the features and FLI group,  
612 we used Leave-One-Group-Out Cross-Validation (LOGOCV) inside the 70% train set to  
613 construct 6 separate models in each optimization step. Because of high dimensionality of the data  
614 (3,423 predictor features) feature selection by filtering was first performed inside the training  
615 data, based on random forest permutation as recommended by Bommert et al.<sup>85</sup> Briefly,  
616 permutation importance is based on accuracy, or specifically the difference in accuracy between  
617 real and permuted (random) values of the specific variable, averaged in all trees across the whole  
618 random forest. The permutation importance in models based on the 6 LOGOCV subsets of the  
619 training data were calculated with mlr 2.16.0,<sup>86</sup> and the simple intersect between the top 50  
620 features in all LOGOCV subsets were retained as the final set of features. Thus, the feature  
621 selection was influenced by the training data from all 6 geographical regions, but this only serves  
622 to limit the number of chosen features because of the required simple intersect. This approach  
623 was used to obtain a set of core predictive features which would have potential for  
624 generalizability across the regions. The number of features included in the models by this  
625 approach was deemed appropriate, since the relative effect size of the last included predictor was  
626 very small ( $< 0.1$  change in classification probability across its range).  
627

628 Bayesian hyperparameter optimization of the xgboost models was then performed with only the  
629 selected features. An optimal set of parameters for the xgboost models were searched over all  
630 LOGOCV subsets with “mbo” in mlrMBO 1.1.3,<sup>87</sup> using 30 preliminary rounds with randomized  
631 parameters, followed by 100 optimization rounds. Parameters in the xgboost models and their  
632 considered ranges were learning rate (eta) [0.001, 0.3], gamma [0.1, 5], maximum depth of a tree  
633 [2, 8], minimum child weight [1, 10], fraction of data subsampled per each iteration [0.2, 0.8],  
634 fraction of columns subsampled per tree [0.2, 0.9], and maximum number of iterations (nrounds)  
635 [50, 5000]. The parameters recommended by these searchers were as following for regression:  
636 eta=0.00889; gamma=2.08; max\_depth=2; min\_child\_weight=8; subsample=0.783;  
637 colsample\_bytree=0.672; nrounds=1,810, and for classification: eta=0.00107; gamma=0.137;  
638 max\_depth=5; min\_child\_weight=9; subsample=0.207; colsample\_bytree=0.793;  
639 nrounds=4,328. We used Root-Mean-Square Error (RMSE) for the regression models and Area  
640 Under the ROC Curve (AUC) for the classification models to measure model fit on the left-out  
641 data (region) in each LOGOCV subset. Receiver operating characteristic and precision-recall  
642 curves for these validation metrics were calculated with “evalmod” in precrec v0.11.2.<sup>88</sup> The  
643 final models were trained on the LOGOCV subset training data, the data from one region thus  
644 omitted per model, and using the selected features and optimized hyperparameters. Internal  
645 validation of these models was conducted against participants only from the region omitted from  
646 each model, in the 30% test data which was not used in model training or optimization.  
647 Sensitivity analysis was conducted by using only the predictive covariates (sex and age) or  
648 balances separately, with the same hyperparameters, data partitions and cross-region internal  
649 validation as for the full models.  
650

651 ***Partial dependence interpretation of the FLI classification models***

652 Because the classification models have a more clinically relevant modeling target for the  
653 difference between  $FLI < 60$  and  $FLI \geq 60$ , the latter used to rule in fatty liver,<sup>26</sup> we further  
654 interpreted the partial dependence of their predictions. Partial dependence of the classification  
655 model predictions on individual features was calculated with “partial” in pdp 0.7.0.<sup>89</sup> The partial  
656 dependence of the features on the model predictions was also plotted, overlaying the results from  
657 each of the 6 models. For each feature, its relative effect on the model prediction was estimated  
658 as medians of the minimum and maximum  $\hat{y}$  (output probability of the model for the  $FLI \geq 60$   
659 class), calculated at the minimum and maximum values of the feature separately in each of the 6  
660 models. The relative effects of the balances were then overlaid as a heatmap on a genome  
661 cladogram which covers all balances in the model with ggtree 2.1.1.<sup>90</sup>

662

663 ***Construction of alternative classification models to discern between***

664 ***FLI < 30 and FLI  $\geq$  60 groups***

665 To assess robustness of the models and how removing the participants with intermediate FLI  
666 (between 30 and 60) affects model performance, we removed this group ( $N = 1910$ ) and  
667 constructed alternative classification models to discern between the  $FLI < 30$  and  $FLI \geq 60$   
668 groups. Other than removing the intermediate FLI participants and resulting new random split to  
669 the train (70%) and test (30%) sets, these models were constructed identically to the main  
670 models, including LOGOCV design, feature selection, and hyperparameter optimization. The  
671 recommended parameters for this classification task were  $\eta=0.00102$ ;  $\gamma=3.7$ ;  
672  $\max\_depth=2$ ;  $\min\_child\_weight=5$ ;  $subsample=0.49$ ;  $colsample\_bytree=0.631$ ;  $nrounds=3,119$ .

673 Interpretation of partial dependence was also performed identically, but only the relative effects  
674 of the model features were plotted without a cladogram.

675

676 ***Exclusion of validation region data from feature selection and hyperparameter***  
677 ***optimization***

678 Because training data from all 6 regions is used to inform the selection of optimal features and  
679 hyperparameters, the validation region data cannot be considered completely independent from  
680 the training of the LOGOCV models. Thus, we constructed a set of classification models for the  
681  $FLI \geq 60$  and  $FLI < 60$  groups, where all validation region samples also in the training data were  
682 excluded from the simple intercept of top 50 features in each LOGOCV set and from the  
683 subsequent hyperparameter optimization. These models with individualized features and  
684 hyperparameters were then tested on the validation region samples in the unseen test data to  
685 estimate how model performance was affected. The main test (70%) and train (30%) sets were  
686 identical to the main models, but additionally 6 randomized 70/30 splits nested inside the test set  
687 (excluding the validation region) were used in hyperparameter optimization to reduce overfitting.

688 Average optimal hyperparameters in the 6 models were  $\eta=0.00106$ ;  $\gamma=4.3$ ;  
689  $\max\_depth=2$ ;  $\min\_child\_weight=7$ ;  $subsample=0.36$ ;  $colsample\_bytree=0.613$ ;  $nrounds=1,772$ .

690

691 ***External validation of the models in a separate population cohort***

692 To further validate our models and results, we leveraged the data from a more recent population  
693 cohort in Finland, FINRISK 2007 (see **Table S1**). In this cohort, the choice of participants,  
694 sample collection, and related methods for the data used in the current study were similar to  
695 FINRISK 2002 to facilitate inter-cohort comparisons, and are reported elsewhere.<sup>30</sup> The study

696 protocol of FINRISK 2007 was approved by the Coordinating Ethical Committee of the Hospital  
697 District of Helsinki and Uusimaa (Ref. 229/EO/2006). All participants have signed an informed  
698 consent.

699

700 Briefly, compared to FINRISK 2002, FINRISK 2007 features a smaller number of participants  
701 who donated fecal samples ( $N = 258$  after excluding pregnant individuals or antibiotic use in the  
702 last 6 months), they were younger on average, and a smaller proportion of them were in the high  
703 FLI group. To produce data for the validation, methods and quality control related to DNA  
704 extraction, sequencing, taxonomic assignments, and calculation of FLI values were identical to  
705 FINRISK 2002 data, as described above. For the phylogenetic transform (performed otherwise  
706 identically), only taxa passing the filtering in FINRISK 2002 bacterial data set were retained in  
707 FINRISK 2007 and a pseudo-count of 1 was used for taxa unobserved in the new data, to exactly  
708 match the node balance names. The FINRISK 2007 data was then subset to the model features of  
709 the main classification models (sex, age, and the 11 bacterial balances), and input in each of the 6  
710 LOGOCV classification models. The results of these predictions were then compared against the  
711 true FLI groups ( $FLI \geq 60$  and  $FLI < 60$ ) of the participants (**Table S5**). Receiver operating  
712 characteristic and precision-recall curves for the external validation were calculated similarly to  
713 the main models for the AUC and AUPRC metrics and plotted after averaging the predictions of  
714 the 6 models to obtain single curves (**Figure S4**).

715

### 716 *Identification of predictive features specific to liver function*

717 Because the FLI also incorporates BMI and waist circumference, and they strongly contribute to  
718 the index,<sup>26</sup> we deemed it necessary to further investigate which of the identified balances were

719 specific to liver function. The participants were first grouped by age (< 40, 40 – 60, and 60 <),  
720 sex (female or male) and BMI (< 25, 25 – 30, and 30 <) into 18 categories ( $N = 105 \sim 711$  per  
721 category). We performed feature selection similarly to the FLI models by fitting random forest  
722 regressors for GGT and triglycerides with mlr 2.16.0.<sup>86</sup> This was done separately in each of the  
723 18 categories, and in each category, we again used LOGOCV with the regions to obtain 6 runs  
724 per category. Finally, the features predictive of GGT or triglycerides in each category were  
725 selected as the intersect of top 50 features in the 6 LOGOCV iterations by permutation  
726 importance. The intersect of features predictive of GGT or triglycerides in any of the categories  
727 and the features predictive of categorical FLI were identified as specific to liver function.

728

### 729 ***Pathway inference for taxa associated with FLI***

730 Our taxonomic matching of the reads is based on the genomes of GTDB (release 89),<sup>29</sup> which are  
731 all complete or nearly complete and available in online databases. This enables us to estimate the  
732 likely genetic content, and thus, the metabolic potential of the microbes associated with FLI. We  
733 use this approach because the sequencing depth of our samples does not allow assembling  
734 contigs and (metagenome-assembled) genomes, required for pathway predictions. Because of the  
735 compositional phylogenetic transform, among other features of our data, previously developed  
736 approaches such as PICRUSt,<sup>91</sup> could not be used here.

737

738 The genomes of all 336 bacteria under at least one of the predictive balances were downloaded  
739 from NCBI. 119 of these genomes were originally not annotated, which is a requirement for  
740 pathway prediction. Therefore, Prokka v1.14.6,<sup>92</sup> was used to annotate the 119 unannotated  
741 genomes as a preliminary step. Pathway predictions were then performed for all 336 genomes



742 with mpwt v0.5.3 multiprocessing tool,<sup>93</sup> for the PathoLogic pipeline of Pathway Tools 23.0.<sup>94</sup>  
743 Pathways for ethanol and short chain fatty acid (acetate, butyrate, propionate) production, bile  
744 acid metabolism, and choline degradation to trimethylamine were identified from MetaCyc  
745 pathway classifications (see ref. <sup>95</sup>, and **Table S4**). The prevalence of these processes was then  
746 assessed in the analyzed genomes and summarized per process to consider the possible links of  
747 the taxa with fatty liver pathophysiology. Finally, the presence of individual pathways for acetate  
748 and ethanol production was also outlined for each genome.

749

#### 750 ***Data availability statement***

751 The analysis code written for this study is included with the Supplementary Information. The  
752 datasets generated during and analyzed during the current study are not public, but are available  
753 based on a written application to the THL Biobank as instructed in: [https://thl.fi/en/web/thl-](https://thl.fi/en/web/thl-biobank/for-researchers)  
754 [biobank/for-researchers](https://thl.fi/en/web/thl-biobank/for-researchers)

755

#### 756 ***Disclosure of interest***

757 V.S. has consulted for Novo Nordisk and Sanofi and received honoraria from these companies.  
758 He also has ongoing research collaboration with Bayer AG, all unrelated to this study. R.L.  
759 serves as a consultant or advisory board member for Anylam/Regeneron, Arrowhead  
760 Pharmaceuticals, AstraZeneca, Bird Rock Bio, Boehringer Ingelheim, Bristol-Myer Squibb,  
761 Celgene, Cirius, CohBar, Conatus, Eli Lilly, Galmed, Gemphire, Gilead, Glympse bio, GNI, GRI  
762 Bio, Inipharm, Intercept, Ionis, Janssen Inc., Merck, Metacrine, Inc., NGM Biopharmaceuticals,  
763 Novartis, Novo Nordisk, Pfizer, Prometheus, Promethera, Sanofi, Siemens, and Viking  
764 Therapeutics. In addition, his institution has received grant support from Allergan, Boehringer-

765 Ingelheim, Bristol-Myers Squibb, Cirius, Eli Lilly and Company, Galectin Therapeutics, Galmed  
766 Pharmaceuticals, GE, Genfit, Gilead, Intercept, Grail, Janssen, Madrigal Pharmaceuticals,  
767 Merck, NGM Biopharmaceuticals, NuSirt, Pfizer, pH Pharma, Prometheus, and Siemens. He is  
768 also co-founder of Liponexus, Inc.

769

### 770 ***Funding details***

771 This research was supported in part by grants from the Finnish Foundation for Cardiovascular  
772 Research, the Emil Aaltonen Foundation, the Paavo Nurmi Foundation, the Urmas Pekkala  
773 Foundation, the Finnish Medical Foundation, the Sigrid Juselius Foundation, the Academy of  
774 Finland (#321356 to A.H.; #295741, #307127 to L.L.; #321351 to T.N.) and the National  
775 Institutes of Health (R01ES027595 to M.J.). R.L. receives funding support from NIEHS  
776 (5P42ES010337), NCATS (5UL1TR001442), NIDDK (U01DK061734, R01DK106419,  
777 P30DK120515, R01DK121378, R01DK124318), and DOD PRCRP (W81XWH-18-2-0026).  
778 Additional support was provided by Illumina, Inc. and Janssen Pharmaceutica through their  
779 sponsorship of the Center for Microbiome Innovation at UCSD.

780

### 781 ***Authors' contributions***

782 M.R., F.Å., V.M., V.S., R.K., L.L and T.N designed the work. A.H., L.V., G.M., P.J., V.S., M.J  
783 and R.K. acquired the data. M.R., L.L. and T.N. analyzed the data. M.R. wrote the manuscript in  
784 consultation with all authors. M.I., P.J., V.S., R.K., L.L. and T.N. supervised the work. All  
785 authors gave final approval of the version to be published.

786

## 787 *Acknowledgements*

788 We thank all participants of the FINRISK 2002 and FINRISK 2007 surveys for their  
789 contributions to this work, and Tara Schwartz for assistance with laboratory work. We also thank  
790 the editor and both anonymous reviewers for their constructive criticism.

791

## 792 **References**

- 793 1. Younossi ZM, Koenig AB, Abdelatif D, Fazel Y, Henry L, Wymer M. Global  
794 epidemiology of nonalcoholic fatty liver disease—Meta-analytic assessment of prevalence,  
795 incidence, and outcomes. *Hepatology* 2016; 64:73–84.
- 796 2. Marchesini G, Bugianesi E, Forlani G, Cerrelli F, Lenzi M, Manini R, Natale S, Vanni E,  
797 Villanova N, Melchionda N, et al. Nonalcoholic fatty liver, steatohepatitis, and the  
798 metabolic syndrome. *Hepatology* 2003; 37:917–23.
- 799 3. Chalasani N, Younossi Z, Lavine JE, Diehl AM, Brunt EM, Cusi K, Charlton M, Sanyal  
800 AJ. The diagnosis and management of non-alcoholic fatty liver disease: Practice Guideline  
801 by the American Association for the Study of Liver Diseases, American College of  
802 Gastroenterology, and the American Gastroenterological Association. *Hepatology* 2012;  
803 55:2005–23.
- 804 4. Yki-Järvinen H. Non-alcoholic fatty liver disease as a cause and a consequence of  
805 metabolic syndrome. *Lancet Diabetes Endocrinol* 2014; 2:901–10.
- 806 5. Toshikuni N, Tsutsumi M, Arisawa T. Clinical differences between alcoholic liver disease  
807 and nonalcoholic fatty liver disease. *World J Gastroenterol* 2014; 20:8393–406.
- 808 6. Rinella M, Charlton M. The globalization of nonalcoholic fatty liver disease: Prevalence  
809 and impact on world health. *Hepatology* 2016; 64:19–22.
- 810 7. Gilbert JA, Blaser MJ, Caporaso JG, Jansson JK, Lynch SV, Knight R. Current  
811 understanding of the human microbiome. *Nat Med* 2018; 24:392–400.
- 812 8. Caussy C, Tripathi A, Humphrey G, Bassirian S, Singh S, Faulkner C, Bettencourt R, Rizo  
813 E, Richards L, Xu ZZ, et al. A gut microbiome signature for cirrhosis due to nonalcoholic  
814 fatty liver disease. *Nature Communications* 2019; 10:1406.
- 815 9. Compare D, Coccoli P, Rocco A, Nardone OM, De Maria S, Carteni M, Nardone G. Gut–  
816 liver axis: The impact of gut microbiota on non alcoholic fatty liver disease. *Nutrition,  
817 Metabolism and Cardiovascular Diseases* 2012; 22:471–6.

- 818 10. Miele L, Valenza V, Torre GL, Montalto M, Cammarota G, Ricci R, Mascianà R, Forgiione  
819 A, Gabrieli ML, Perotti G, et al. Increased intestinal permeability and tight junction  
820 alterations in nonalcoholic fatty liver disease. *Hepatology* 2009; 49:1877–87.
- 821 11. Spencer MD, Hamp TJ, Reid RW, Fischer LM, Zeisel SH, Fodor AA. Association Between  
822 Composition of the Human Gastrointestinal Microbiome and Development of Fatty Liver  
823 With Choline Deficiency. *Gastroenterology* 2011; 140:976–86.
- 824 12. Zhu L, Baker SS, Gill C, Liu W, Alkhoury R, Baker RD, Gill SR. Characterization of gut  
825 microbiomes in nonalcoholic steatohepatitis (NASH) patients: A connection between  
826 endogenous alcohol and NASH. *Hepatology* 2013; 57:601–9.
- 827 13. Yuan J, Chen C, Cui J, Lu J, Yan C, Wei X, Zhao X, Li N, Li S, Xue G, et al. Fatty Liver  
828 Disease Caused by High-Alcohol-Producing *Klebsiella pneumoniae*. *Cell Metabolism*  
829 2019; 30:675-688.e7.
- 830 14. Loomba R, Seguritan V, Li W, Long T, Klitgord N, Bhatt A, Dulai PS, Caussy C,  
831 Bettencourt R, Highlander SK, et al. Gut Microbiome-Based Metagenomic Signature for  
832 Non-invasive Detection of Advanced Fibrosis in Human Nonalcoholic Fatty Liver Disease.  
833 *Cell Metabolism* 2017; 25:1054-1062.e5.
- 834 15. Jiao N, Wu D, Yang Z, Fang S, Li X, Yuan M, Zhu R, Zhu L. Gut bacteria contributes to  
835 NAFLD pathogenesis by promoting secondary bile acids biosynthesis. *The FASEB Journal*  
836 2019; 33:126.4-126.4.
- 837 16. Aron-Wisnewsky J, Vigliotti C, Witjes J, Le P, Holleboom AG, Verheij J, Nieuwdorp M,  
838 Clément K. Gut microbiota and human NAFLD: disentangling microbial signatures from  
839 metabolic disorders. *Nature Reviews Gastroenterology & Hepatology* 2020; 17:279–97.
- 840 17. Qin N, Yang F, Li A, Prifti E, Chen Y, Shao L, Guo J, Le Chatelier E, Yao J, Wu L, et al.  
841 Alterations of the human gut microbiome in liver cirrhosis. *Nature* 2014; 513:59–64.
- 842 18. Liu Y, Meric G, Havulinna AS, Teo SM, Ruuskanen M, Sanders J, Zhu Q, Tripathi A,  
843 Verspoor K, Cheng S, et al. Early prediction of liver disease using conventional risk factors  
844 and gut microbiome-augmented gradient boosting [Internet]. *Genetic and Genomic*  
845 *Medicine*; 2020 [cited 2020 Jul 28]. Available from:  
846 <http://medrxiv.org/lookup/doi/10.1101/2020.06.24.20138933>
- 847 19. Safari Z, Gérard P. The links between the gut microbiome and non-alcoholic fatty liver  
848 disease (NAFLD). *Cell Mol Life Sci* 2019; 76:1541–58.
- 849 20. Carpino G, Del Ben M, Pastori D, Carnevale R, Baratta F, Overi D, Francis H, Cardinale V,  
850 Onori P, Safarikia S, et al. Increased liver localization of lipopolysaccharides in human and  
851 experimental non-alcoholic fatty liver disease. *Hepatology* 2019; :hep.31056.
- 852 21. Li Q, Dhyani M, Grajo JR, Sirlin C, Samir AE. Current status of imaging in nonalcoholic  
853 fatty liver disease. *World J Hepatol* 2018; 10:530–42.

- 854 22. Koehler EM, Schouten JNL, Hansen BE, Hofman A, Stricker BH, Janssen HLA. External  
855 Validation of the Fatty Liver Index for Identifying Nonalcoholic Fatty Liver Disease in a  
856 Population-based Study. *Clinical Gastroenterology and Hepatology* 2013; 11:1201–4.
- 857 23. Vanni E, Bugianesi E. Editorial: utility and pitfalls of Fatty Liver Index in epidemiologic  
858 studies for the diagnosis of NAFLD. *Aliment Pharmacol Ther* 2015; 41:406–7.
- 859 24. Salosensaari A, Laitinen V, Havulinna AS, Meric G, Cheng S, Perola M, Valsta L, Alfthan  
860 G, Inouye M, Watrous JD, et al. Taxonomic Signatures of Long-Term Mortality Risk in  
861 Human Gut Microbiota [Internet]. *Epidemiology*; 2020 [cited 2020 Jan 4]. Available from:  
862 <http://medrxiv.org/lookup/doi/10.1101/2019.12.30.19015842>
- 863 25. Alexander M, Loomis AK, Fairburn-Beech J, van der Lei J, Duarte-Salles T, Prieto-  
864 Alhambra D, Ansell D, Pasqua A, Lapi F, Rijnbeek P, et al. Real-world data reveal a  
865 diagnostic gap in non-alcoholic fatty liver disease. *BMC Medicine* 2018; 16:130.
- 866 26. Bedogni G, Bellentani S, Miglioli L, Masutti F, Passalacqua M, Castiglione A, Tiribelli C.  
867 The Fatty Liver Index: a simple and accurate predictor of hepatic steatosis in the general  
868 population. *BMC Gastroenterol* 2006; 6:33.
- 869 27. Hillmann B, Al-Ghalith GA, Shields-Cutler RR, Zhu Q, Gohl DM, Beckman KB, Knight R,  
870 Knights D. Evaluating the Information Content of Shallow Shotgun Metagenomics.  
871 *mSystems* [Internet] 2018 [cited 2020 Apr 9]; 3. Available from:  
872 <https://msystems.asm.org/content/3/6/e00069-18>
- 873 28. Silverman JD, Washburne AD, Mukherjee S, David LA. A phylogenetic transform  
874 enhances analysis of compositional microbiota data. *eLife* 2017; 6:e21887.
- 875 29. Parks DH, Chuvochina M, Waite DW, Rinke C, Skarshewski A, Chaumeil P-A,  
876 Hugenholtz P. A standardized bacterial taxonomy based on genome phylogeny  
877 substantially revises the tree of life. *Nat Biotechnol* 2018; 36:996–1004.
- 878 30. Borodulin K, Tolonen H, Jousilahti P, Jula A, Juolevi A, Koskinen S, Kuulasmaa K,  
879 Laatikainen T, Männistö S, Peltonen M, et al. Cohort Profile: The National FINRISK  
880 Study. *International Journal of Epidemiology* 2018; 47:696–696i.
- 881 31. Banderas DZ, Escobedo J, Gonzalez E, Liceaga MG, Ramirez JC, Castro MG.  $\gamma$ -Glutamyl  
882 transferase: a marker of nonalcoholic fatty liver disease in patients with the metabolic  
883 syndrome. *European Journal of Gastroenterology & Hepatology* 2012; 24:805–810.
- 884 32. Haas JT, Francque S, Staels B. Pathophysiology and Mechanisms of Nonalcoholic Fatty  
885 Liver Disease. *Annual Review of Physiology* 2016; 78:181–205.
- 886 33. He Y, Wu W, Zheng H-M, Li P, McDonald D, Sheng H-F, Chen M-X, Chen Z-H, Ji G-Y,  
887 Zheng Z-D-X, et al. Regional variation limits applications of healthy gut microbiome  
888 reference ranges and disease models. *Nature Medicine* 2018; 24:1532–5.

- 889 34. Carvalhana S, Leitão J, Alves AC, Bourbon M, Cortez-Pinto H. How good is controlled  
890 attenuation parameter and fatty liver index for assessing liver steatosis in general  
891 population: correlation with ultrasound. *Liver International* 2014; 34:e111–7.
- 892 35. Dehnavi Z, Razmpour F, Naseri MB, Nematy M, Alamdaran SA, Vatanparast HA, Nezhad  
893 MA, Abbasi B, Ganji A. Fatty liver index (FLI) in predicting non-alcoholic fatty liver  
894 disease (NAFLD). *Hepatitis Monthly* 2018; 18.
- 895 36. Yang B-L, Wu W-C, Fang K-C, Wang Y-C, Huo T-I, Huang Y-H, Yang H-I, Su C-W, Lin  
896 H-C, Lee F-Y, et al. External Validation of Fatty Liver Index for Identifying  
897 Ultrasonographic Fatty Liver in a Large-Scale Cross-Sectional Study in Taiwan. *PLOS*  
898 *ONE* 2015; 10:e0120443.
- 899 37. Huang X, Xu M, Chen Y, Peng K, Huang Y, Wang P, Ding L, Lin L, Xu Y, Chen Y, et al.  
900 Validation of the Fatty Liver Index for Nonalcoholic Fatty Liver Disease in Middle-Aged  
901 and Elderly Chinese. *Medicine (Baltimore)* 2015; 94:e1682.
- 902 38. Kim H-N, Joo E-J, Cheong HS, Kim Y, Kim H-L, Shin H, Chang Y, Ryu S. Gut  
903 Microbiota and Risk of Persistent Nonalcoholic Fatty Liver Diseases. *Journal of Clinical*  
904 *Medicine* 2019; 8:1089.
- 905 39. Castaner O, Goday A, Park Y-M, Lee S-H, Magkos F, Shiow S-ATE, Schröder H. The Gut  
906 Microbiome Profile in Obesity: A Systematic Review. *Int J Endocrinol [Internet]* 2018  
907 [cited 2020 Apr 3]; 2018. Available from:  
908 <https://www.ncbi.nlm.nih.gov/pmc/articles/PMC5933040/>
- 909 40. Wigg AJ, Roberts-Thomson IC, Dymock RB, McCarthy PJ, Grose RH, Cummins AG. The  
910 role of small intestinal bacterial overgrowth, intestinal permeability, endotoxaemia, and  
911 tumour necrosis factor  $\alpha$  in the pathogenesis of non-alcoholic steatohepatitis. *Gut* 2001;  
912 48:206–11.
- 913 41. Mouzaki M, Comelli EM, Arendt BM, Bonengel J, Fung SK, Fischer SE, McGilvray ID,  
914 Allard JP. Intestinal microbiota in patients with nonalcoholic fatty liver disease. *Hepatology*  
915 2013; 58:120–7.
- 916 42. Shen F, Zheng R-D, Sun X-Q, Ding W-J, Wang X-Y, Fan J-G. Gut microbiota dysbiosis in  
917 patients with non-alcoholic fatty liver disease. *Hepatobiliary & Pancreatic Diseases*  
918 *International* 2017; 16:375–81.
- 919 43. Sharpton SR, Ajmera V, Loomba R. Emerging Role of the Gut Microbiome in  
920 Nonalcoholic Fatty Liver Disease: From Composition to Function. *Clinical*  
921 *Gastroenterology and Hepatology* 2019; 17:296–306.
- 922 44. Jiang W, Wu N, Wang X, Chi Y, Zhang Y, Qiu X, Hu Y, Li J, Liu Y. Dysbiosis gut  
923 microbiota associated with inflammation and impaired mucosal immune function in  
924 intestine of humans with non-alcoholic fatty liver disease. *Sci Rep* 2015; 5:8096.

- 925 45. de la Cuesta-Zuluaga J, Corrales-Agudelo V, Velásquez-Mejía EP, Carmona JA, Abad JM,  
926 Escobar JS. Gut microbiota is associated with obesity and cardiometabolic disease in a  
927 population in the midst of Westernization. *Scientific Reports* 2018; 8:11356.
- 928 46. O'Callaghan A, van Sinderen D. Bifidobacteria and Their Role as Members of the Human  
929 Gut Microbiota. *Front Microbiol* [Internet] 2016 [cited 2020 Nov 9]; 7. Available from:  
930 <https://www.ncbi.nlm.nih.gov/pmc/articles/PMC4908950/>
- 931 47. Waters JL, Ley RE. The human gut bacteria Christensenellaceae are widespread, heritable,  
932 and associated with health. *BMC Biology* 2019; 17:83.
- 933 48. Ferreira-Halder CV, Faria AV de S, Andrade SS. Action and function of *Faecalibacterium*  
934 *prausnitzii* in health and disease. *Best Pract Res Clin Gastroenterol* 2017; 31:643–8.
- 935 49. Suzuki TA, Worobey M. Geographical variation of human gut microbial composition.  
936 *Biology Letters* 2014; 10:20131037.
- 937 50. Meslier V, Laiola M, Roager HM, Filippis FD, Roume H, Quinquis B, Giacco R, Mennella  
938 I, Ferracane R, Pons N, et al. Mediterranean diet intervention in overweight and obese  
939 subjects lowers plasma cholesterol and causes changes in the gut microbiome and  
940 metabolome independently of energy intake. *Gut* [Internet] 2020 [cited 2020 Jun 2];  
941 Available from: <https://gut.bmj.com/content/early/2020/02/18/gutjnl-2019-320438>
- 942 51. Cui C, Li Y, Gao H, Zhang H, Han J, Zhang D, Li Y, Zhou J, Lu C, Su X. Modulation of  
943 the gut microbiota by the mixture of fish oil and krill oil in high-fat diet-induced obesity  
944 mice. *PLOS ONE* 2017; 12:e0186216.
- 945 52. Manzoor SE, McNulty CAM, Nakiboneka-Ssenabulya D, Lecky DM, Hardy KJ, Hawkey  
946 PM. Investigation of community carriage rates of *Clostridium difficile* and *Hungatella*  
947 *hathewayi* in healthy volunteers from four regions of England. *Journal of Hospital Infection*  
948 2017; 97:153–5.
- 949 53. Genoni A, Christophersen CT, Lo J, Coghlan M, Boyce MC, Bird AR, Lyons-Wall P,  
950 Devine A. Long-term Paleolithic diet is associated with lower resistant starch intake,  
951 different gut microbiota composition and increased serum TMAO concentrations. *Eur J*  
952 *Nutr* 2020; 59:1845–58.
- 953 54. Burton KJ, Krüger R, Scherz V, Mürnger LH, Picone G, Vionnet N, Bertelli C, Greub G,  
954 Capozzi F, Vergères G. Trimethylamine-N-Oxide Postprandial Response in Plasma and  
955 Urine Is Lower After Fermented Compared to Non-Fermented Dairy Consumption in  
956 Healthy Adults. *Nutrients* 2020; 12:234.
- 957 55. Hillmann B, Al-Ghalith GA, Shields-Cutler RR, Zhu Q, Knight R, Knights D. SHOGUN: a  
958 modular, accurate, and scalable framework for microbiome quantification. *Bioinformatics*  
959 2020; :btaa277.

- 960 56. de Faria Ghatti F, Oliveira DG, de Oliveira JM, de Castro Ferreira LEVV, Cesar DE,  
961 Moreira APB. Influence of gut microbiota on the development and progression of  
962 nonalcoholic steatohepatitis. *Eur J Nutr* 2018; 57:861–76.
- 963 57. Mohan R, Namsolleck P, Lawson PA, Osterhoff M, Collins MD, Alpert C-A, Blaut M.  
964 *Clostridium asparagiforme* sp. nov., isolated from a human faecal sample. *Systematic and*  
965 *Applied Microbiology* 2006; 29:292–9.
- 966 58. Murray WD, Khan AW, van den BERG L. *Clostridium saccharolyticum* sp. nov., a  
967 Saccharolytic Species from Sewage Sludge. *International Journal of Systematic*  
968 *Bacteriology* 1982; 32:132–5.
- 969 59. Diether NE, Willing BP. Microbial Fermentation of Dietary Protein: An Important Factor in  
970 Diet–Microbe–Host Interaction. *Microorganisms* [Internet] 2019 [cited 2020 Apr 24]; 7.  
971 Available from: <https://www.ncbi.nlm.nih.gov/pmc/articles/PMC6352118/>
- 972 60. Zhao S, Jang C, Liu J, Uehara K, Gilbert M, Izzo L, Zeng X, Trefely S, Fernandez S, Carrer  
973 A, et al. Dietary fructose feeds hepatic lipogenesis via microbiota-derived acetate. *Nature*  
974 2020; 579:586–91.
- 975 61. Dehoux P, Marvaud JC, Abouelleil A, Earl AM, Lambert T, Dauga C. Comparative  
976 genomics of *Clostridium bolteae* and *Clostridium clostridioforme* reveals species-specific  
977 genomic properties and numerous putative antibiotic resistance determinants. *BMC*  
978 *Genomics* 2016; 17:819.
- 979 62. Deschasaux M, Bouter KE, Prodan A, Levin E, Groen AK, Herrema H, Tremaroli V,  
980 Bakker GJ, Attaye I, Pinto-Sietsma S-J, et al. Depicting the composition of gut microbiota  
981 in a population with varied ethnic origins but shared geography. *Nature Medicine* 2018;  
982 24:1526–31.
- 983 63. Canfora EE, Meex RCR, Venema K, Blaak EE. Gut microbial metabolites in obesity,  
984 NAFLD and T2DM. *Nature Reviews Endocrinology* 2019; 15:261–73.
- 985 64. Cheng H-Y, Wang H-Y, Chang W-H, Lin S-C, Chu C-H, Wang T-E, Liu C-C, Shih S-C.  
986 Nonalcoholic Fatty Liver Disease: Prevalence, Influence on Age and Sex, and Relationship  
987 with Metabolic Syndrome and Insulin Resistance. *International Journal of Gerontology*  
988 2013; 7:194–8.
- 989 65. Lonardo A, Nascimbeni F, Ballestri S, Fairweather D, Win S, Than TA, Abdelmalek MF,  
990 Suzuki A. Sex Differences in Nonalcoholic Fatty Liver Disease: State of the Art and  
991 Identification of Research Gaps. *Hepatology* 2019; 70:1457–69.
- 992 66. Näyhä S. Geographical variations in cardiovascular mortality in Finland, 1961-1985. *Scand*  
993 *J Soc Med Suppl* 1989; 40:1–48.
- 994 67. Kerminen S, Havulinna AS, Hellenthal G, Martin AR, Sarin A-P, Perola M, Palotie A,  
995 Salomaa V, Daly MJ, Ripatti S, et al. Fine-Scale Genetic Structure in Finland. *G3: Genes,*  
996 *Genomes, Genetics* 2017; 7:3459–68.



- 997 68. Reccia I, Kumar J, Akladios C, Viridis F, Pai M, Habib N, Spalding D. Non-alcoholic fatty  
998 liver disease: A sign of systemic disease. *Metabolism* 2017; 72:94–108.
- 999 69. Eslam M, Sanyal AJ, George J, Sanyal A, Neuschwander-Tetri B, Tiribelli C, Kleiner DE,  
1000 Brunt E, Bugianesi E, Yki-Järvinen H, et al. MAFLD: A Consensus-Driven Proposed  
1001 Nomenclature for Metabolic Associated Fatty Liver Disease. *Gastroenterology* 2020;  
1002 158:1999-2014.e1.
- 1003 70. Borodulin K, Vartiainen E, Peltonen M, Jousilahti P, Juolevi A, Laatikainen T, Männistö S,  
1004 Salomaa V, Sundvall J, Puska P. Forty-year trends in cardiovascular risk factors in Finland.  
1005 *Eur J Public Health* 2015; 25:539–46.
- 1006 71. Marotz L, Schwartz T, Thompson L, Humphrey G, Gogul G, Gaffney J, Amir A, Knight R.  
1007 Earth Microbiome Project (EMP) high throughput (HTP) DNA extraction protocol v1  
1008 (protocols.io.pdmdi46) [Internet]. 2018 [cited 2020 Nov 10]; Available from:  
1009 [https://www.protocols.io/view/earth-microbiome-project-emp-high-throughput-htp-d-](https://www.protocols.io/view/earth-microbiome-project-emp-high-throughput-htp-d-pdmdi46)  
1010 [pdmdi46](https://www.protocols.io/view/earth-microbiome-project-emp-high-throughput-htp-d-pdmdi46)
- 1011 72. Sanders JG, Nurk S, Salido RA, Minich J, Xu ZZ, Zhu Q, Martino C, Fedarko M, Arthur  
1012 TD, Chen F, et al. Optimizing sequencing protocols for leaderboard metagenomics by  
1013 combining long and short reads. *Genome Biology* 2019; 20:226.
- 1014 73. Glenn TC, Nilsen RA, Kieran TJ, Sanders JG, Bayona-Vásquez NJ, Finger JW, Pierson  
1015 TW, Bentley KE, Hoffberg SL, Louha S, et al. Adapterama I: universal stubs and primers  
1016 for 384 unique dual-indexed or 147,456 combinatorially-indexed Illumina libraries (iTru &  
1017 iNext). *PeerJ* 2019; 7:e7755.
- 1018 74. Didion JP, Martin M, Collins FS. Atropos: specific, sensitive, and speedy trimming of  
1019 sequencing reads. *PeerJ* [Internet] 2017 [cited 2020 Nov 10]; 5. Available from:  
1020 <https://www.ncbi.nlm.nih.gov/pmc/articles/PMC5581536/>
- 1021 75. Langmead B, Salzberg SL. Fast gapped-read alignment with Bowtie 2. *Nat Methods* 2012;  
1022 9:357–9.
- 1023 76. Méric G, Wick RR, Watts SC, Holt KE, Inouye M. Correcting index databases improves  
1024 metagenomic studies. *bioRxiv* 2019; :712166.
- 1025 77. Parks DH, Chuvochina M, Chaumeil P-A, Rinke C, Mussig AJ, Hugenholtz P. A complete  
1026 domain-to-species taxonomy for Bacteria and Archaea. *Nature Biotechnology* 2020; :1–8.
- 1027 78. Kim D, Song L, Breitwieser FP, Salzberg SL. Centrifuge: rapid and sensitive classification  
1028 of metagenomic sequences. *Genome Res* [Internet] 2016 [cited 2018 May 12]; Available  
1029 from: <http://genome.cshlp.org/content/early/2016/11/16/gr.210641.116>
- 1030 79. R Core Team. R: A language and environment for statistical computing [Internet]. Vienna,  
1031 Austria: R Foundation for Statistical Computing; 2018 [cited 2019 Mar 4]. Available from:  
1032 <https://www.R-project.org/>

- 1033 80. McMurdie PJ, Holmes S. phyloseq: An R package for reproducible interactive analysis and  
1034 graphics of microbiome census data. *PLoS ONE* 2013; 8:e61217.
- 1035 81. Gloor GB, Macklaim JM, Pawlowsky-Glahn V, Egozcue JJ. Microbiome Datasets Are  
1036 Compositional: And This Is Not Optional. *Front Microbiol* [Internet] 2017 [cited 2020 Jul  
1037 20]; 8. Available from: <https://www.ncbi.nlm.nih.gov/pmc/articles/PMC5695134/>
- 1038 82. Louca S, Polz MF, Mazel F, Albright MBN, Huber JA, O'Connor MI, Ackermann M, Hahn  
1039 AS, Srivastava DS, Crowe SA, et al. Function and functional redundancy in microbial  
1040 systems. *Nat Ecol Evol* 2018; 2:936–43.
- 1041 83. Oksanen J, Blanchet FG, Friendly M, Kindt R, Legendre P, McGlinn D, Minchin PR,  
1042 O'Hara RB, Simpson GL, Solymos P, et al. *vegan: Community Ecology Package* [Internet].  
1043 2018 [cited 2018 Jun 4]. Available from: <https://CRAN.R-project.org/package=vegan>
- 1044 84. Chen T, Guestrin C. XGBoost: A Scalable Tree Boosting System. *Proceedings of the 22nd  
1045 ACM SIGKDD International Conference on Knowledge Discovery and Data Mining -  
1046 KDD '16* 2016; :785–94.
- 1047 85. Bommert A, Sun X, Bischl B, Rahnenführer J, Lang M. Benchmark for filter methods for  
1048 feature selection in high-dimensional classification data. *Computational Statistics & Data  
1049 Analysis* 2020; 143:106839.
- 1050 86. Bischl B, Lang M, Kotthoff L, Schiffner J, Richter J, Studerus E, Casalicchio G, Jones ZM.  
1051 *mlr: Machine Learning in R*. *Journal of Machine Learning Research* 2016; 17:1–5.
- 1052 87. Bischl B, Richter J, Bossek J, Horn D, Thomas J, Lang M. *mlrMBO: A Modular  
1053 Framework for Model-Based Optimization of Expensive Black-Box Functions*.  
1054 *arXiv:170303373 [stat]* [Internet] 2018 [cited 2020 Feb 18]; Available from:  
1055 <http://arxiv.org/abs/1703.03373>
- 1056 88. Saito T, Rehmsmeier M. *Precrec: fast and accurate precision–recall and ROC curve  
1057 calculations in R*. *Bioinformatics* 2017; 33:145–7.
- 1058 89. Greenwell BM. *pdp: An R Package for Constructing Partial Dependence Plots*. *The R  
1059 Journal* 2017; 9:421–36.
- 1060 90. Yu G, Smith DK, Zhu H, Guan Y, Lam TT-Y. *ggtree: an r package for visualization and  
1061 annotation of phylogenetic trees with their covariates and other associated data*. *Methods in  
1062 Ecology and Evolution* 2017; 8:28–36.
- 1063 91. Douglas GM, Maffei VJ, Zaneveld J, Yurgel SN, Brown JR, Taylor CM, Huttenhower C,  
1064 Langille MGI. *PICRUSt2: An improved and extensible approach for metagenome  
1065 inference*. *bioRxiv* 2019; :672295.
- 1066 92. Seemann T. *Prokka: rapid prokaryotic genome annotation*. *Bioinformatics* 2014; 30:2068–  
1067 9.

- 1068 93. Belcour A, Frioux C, Aite M, Bretaudeau A, Siegel A. Metage2Metabo: metabolic  
1069 complementarity applied to genomes of large-scale microbiotas for the identification of  
1070 keystone species. bioRxiv 2019; :803056.
- 1071 94. Karp PD, Midford PE, Billington R, Kothari A, Krummenacker M, Latendresse M, Ong  
1072 WK, Subhraveti P, Caspi R, Fulcher C, et al. Pathway Tools version 23.0 update: software  
1073 for pathway/genome informatics and systems biology. Briefings in Bioinformatics  
1074 2019; :bbz104.
- 1075 95. Caspi R, Billington R, Fulcher CA, Keseler IM, Kothari A, Krummenacker M, Latendresse  
1076 M, Midford PE, Ong Q, Ong WK, et al. The MetaCyc database of metabolic pathways and  
1077 enzymes. Nucleic Acids Res 2018; 46:D633–9.
- 1078

## 1079 **Figures**

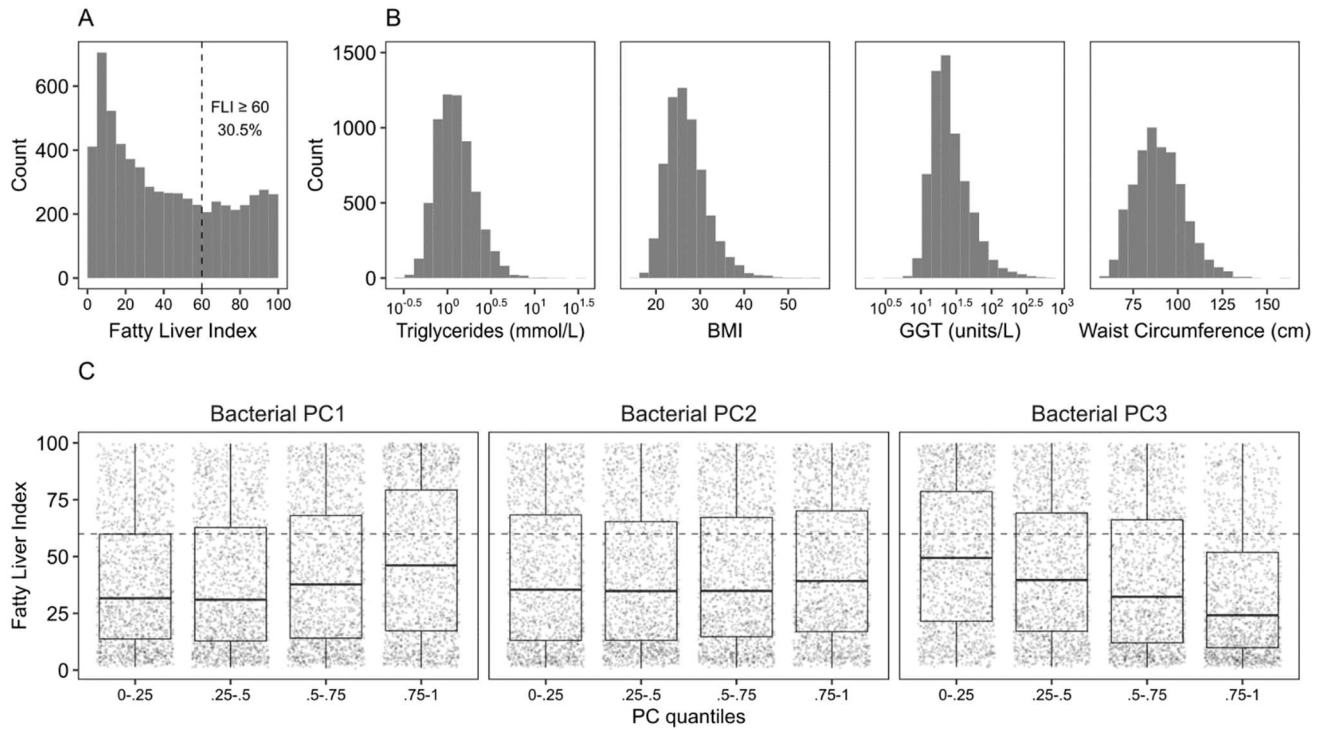

1080 **Figure 1.** Distribution of FLI (A), its components (B), and FLI in quantiles of the first three PC  
1081 components of the fecal bacterial composition of the participants (C). The cutoff at FLI = 60  
1082 used to divide the participants is indicated with a dashed line in panels A and C.

It is made available under a [CC-BY 4.0 International license](https://creativecommons.org/licenses/by/4.0/).

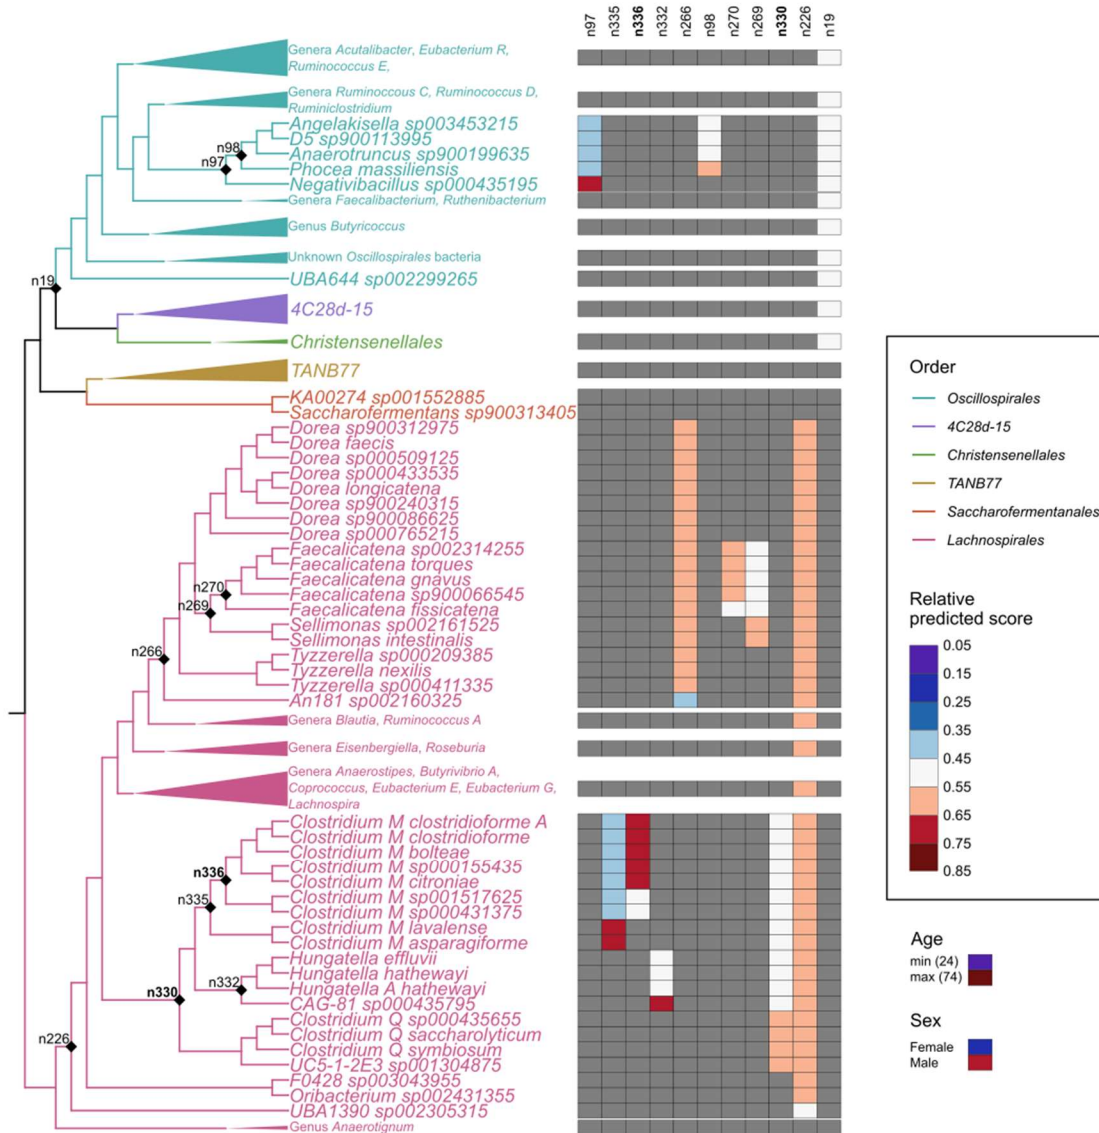

1083 **Figure 2.** Relative effects of predictive balances and covariates on the FLI < 60 and FLI ≥ 60  
 1084 classification model (AUC = 0.75) predictions. Nodes of the balances are indicated in the  
 1085 cladogram and the relative effect sizes of their clades (opposite sides of each balance) are shown  
 1086 in the associated heatmap. The relative effect sizes of the covariates (age and sex) are shown  
 1087 below the legend with a heatmap on the same scale as was used for the balances. The two liver-  
 1088 specific balances associated with triglyceride and GGT levels are indicated with bold font.  
 1089 Clades with redundant information have been collapsed but their major genera are indicated. The  
 1090 complete tree is included in **Figure S6**.
